# Supplementary material for: Cyclic Hexapeptide from Bouvardia ternifolia (Cav.) Schltdl. and Neuroprotective Effects of Root Extracts
Source: MDPI journal article supplement (doi:10.3390/plants12142600), 2023-07-10
Supplement: s1 [file s1]

Type of the Paper (Article)

# Cyclic hexapeptide from *Bouvardia ternifolia* (Cav.) Schltdl. and neuroprotective effects of root extracts.

Yury Maritza Zapata Lopera <sup>1,2</sup>, Gabriela Trejo-Tapia <sup>2\*\*</sup>, Manasés González-Cortazar <sup>1</sup>, Maribel Herrera-Ruiz <sup>1</sup>, Alejandro Zamilpa <sup>1</sup> and Enrique Jiménez-Ferrer <sup>1\*</sup>

<sup>1</sup> Centro de Investigación Biomédica del Sur, Instituto Mexicano del Seguro Social, Xochitepec 62790, Morelos, México

<sup>2</sup> Centro de Desarrollo de Productos Bióticos, Instituto Politécnico Nacional, Yautepec 62730, Morelos, México

\* Correspondence: enriqueferrer\_mx@yahoo.com (E.J.-F.) \*\* Second corresponding author (G.T.-T.).

---

## Content

**Figure S1.** GC–MS Analysis of the BtD extract

**Figure S2.** GC–MS Analysis of the BtH extract

**Figure S3.** Spectrum UV and HPLC of cyclic hexapeptide

**Figure S4.** Mass spectrum (MS) of cyclic hexapeptide

**Figure S5.** <sup>1</sup>H NMR (CD<sub>3</sub>OD, 400 MHz) of cyclic hexapeptide

**Figure S6.** <sup>13</sup>C NMR (CD<sub>3</sub>OD, 400 MHz) of cyclic hexapeptide

**Figure S7.** The <sup>13</sup>C NMR (DEPT) spectrum of cyclic hexapeptide

**Figure S8.** The HMBC spectrum of cyclic hexapeptide

**Figure S9.** The <sup>1</sup>H-<sup>1</sup>H COSY spectrum of cyclic hexapeptide

---

# Figure S1. GC–MS Analysis of the BtD extract

## Area Percent Report

Data File : C:\MSDCHEM\2\DATA\014-LGC.D Vial: 95  
 Acq On : 18 Oct 2022 9:59 Operator: M.G.M  
 Sample : BTZCDCI3 Splitless 40°C-1min, Inst : Instrumen  
 Misc : 10°C/min-250°C-5min,10°C/min-20min Multiplr: 1.00  
 Sample Amount: 1.00

MS Integration Params: autoint1.e

Signal : TIC

| peak<br># | R.T.<br>min | first<br>scan | max last<br>scan | PK<br>scan | peak<br>TY | peak<br>height | corr.<br>area | corr.<br>% max. | % of<br>total |
|-----------|-------------|---------------|------------------|------------|------------|----------------|---------------|-----------------|---------------|
| 1         | 6.893       | 117           | 124              | 137        | M          | 220731         | 5563550       | 3.39%           | 1.208%        |
| 2         | 19.840      | 2087          | 2095             | 2121       | BV         | 2252539        | 66055036      | 40.24%          | 14.343%       |
| 3         | 20.221      | 2143          | 2153             | 2165       | VV 2       | 538038         | 12801791      | 7.80%           | 2.780%        |
| 4         | 20.924      | 2252          | 2260             | 2274       | M          | 528670         | 13685068      | 8.34%           | 2.972%        |
| 5         | 21.193      | 2295          | 2301             | 2342       | BB         | 974166         | 52105698      | 31.74%          | 11.314%       |
| 6         | 22.008      | 2417          | 2425             | 2434       | VV         | 809337         | 15743630      | 9.59%           | 3.419%        |
| 7         | 25.055      | 2880          | 2889             | 2898       | M          | 1138838        | 32704637      | 19.92%          | 7.102%        |
| 8         | 27.722      | 3288          | 3295             | 3310       | VB         | 898734         | 30700493      | 18.70%          | 6.666%        |
| 9         | 28.826      | 3451          | 3463             | 3476       | BB         | 1485641        | 42057954      | 25.62%          | 9.133%        |
| 10        | 32.780      | 4027          | 4065             | 4150       | BB 3       | 848609         | 164147530     | 100.00%         | 35.643%       |
| 11        | 34.744      | 4350          | 4364             | 4384       | VB 2       | 606289         | 24963514      | 15.21%          | 5.421%        |

Sum of corrected areas: 460528900

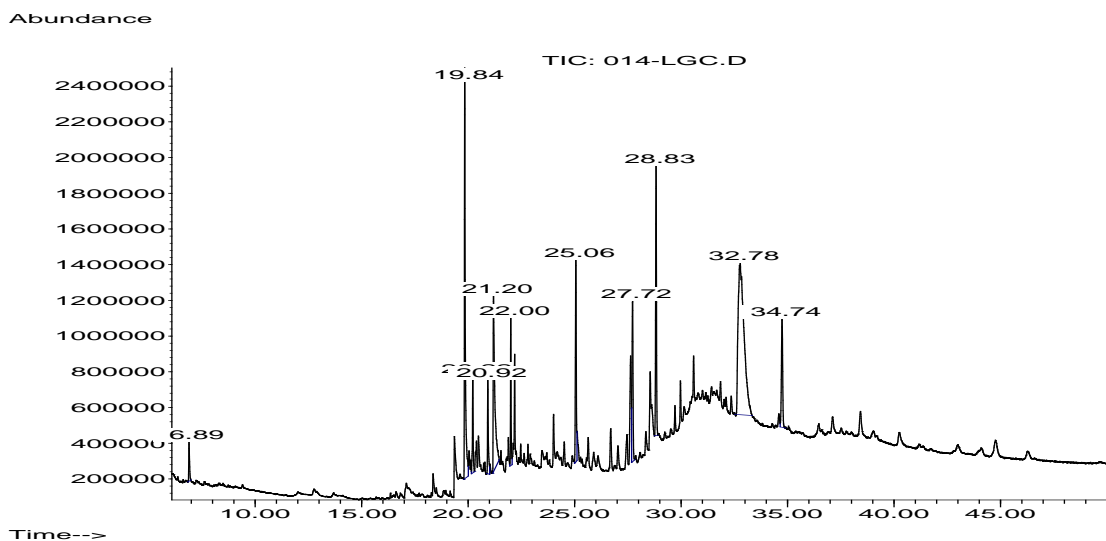

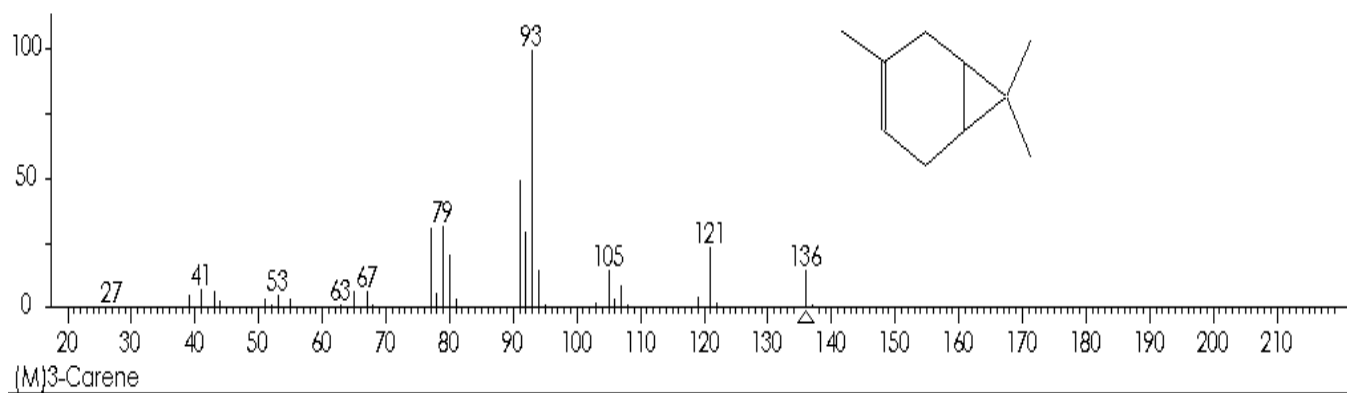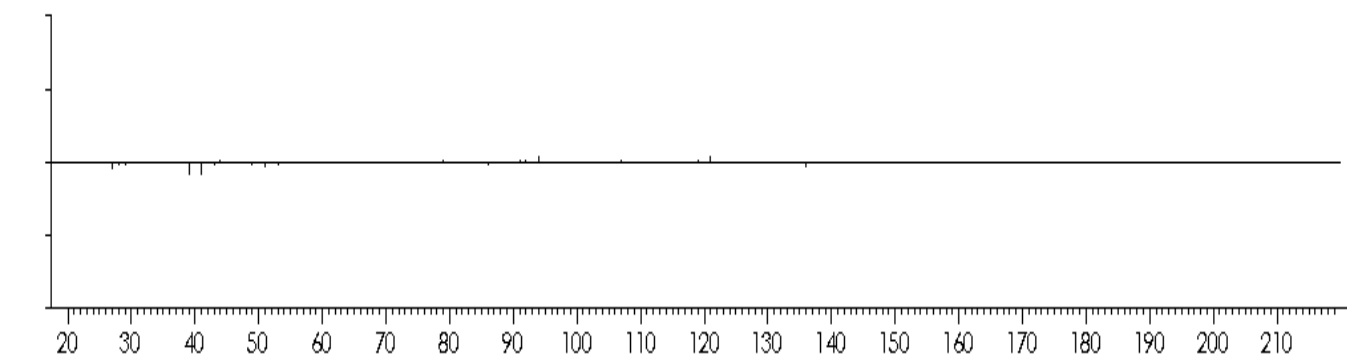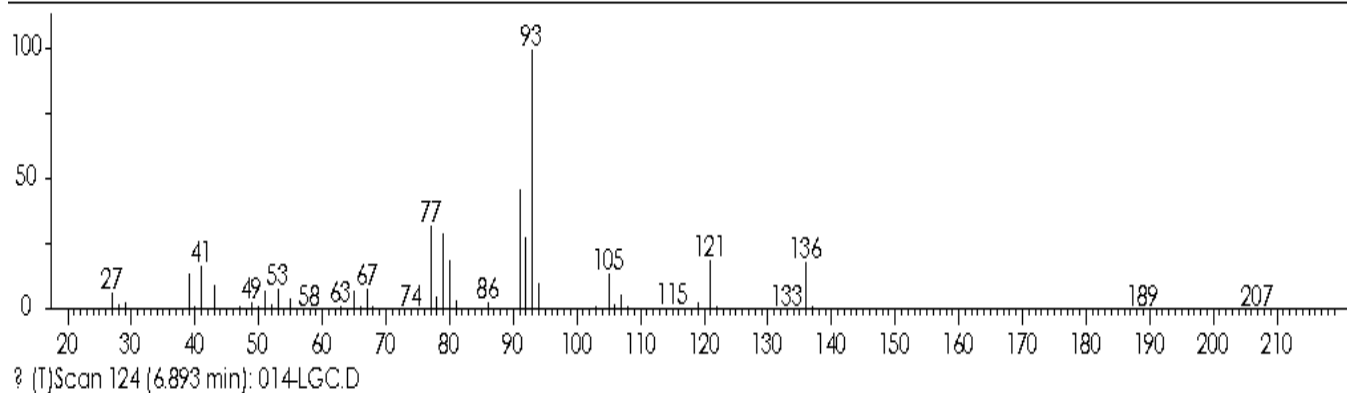

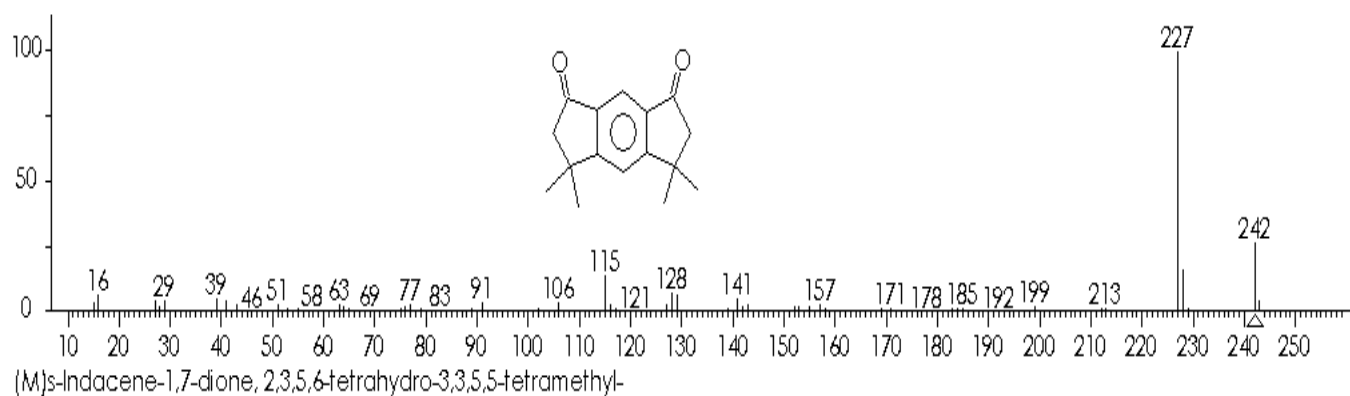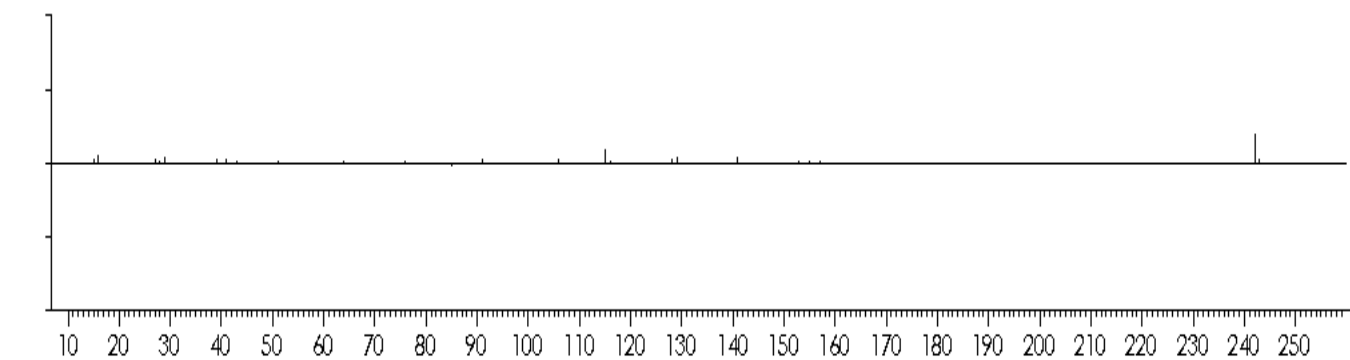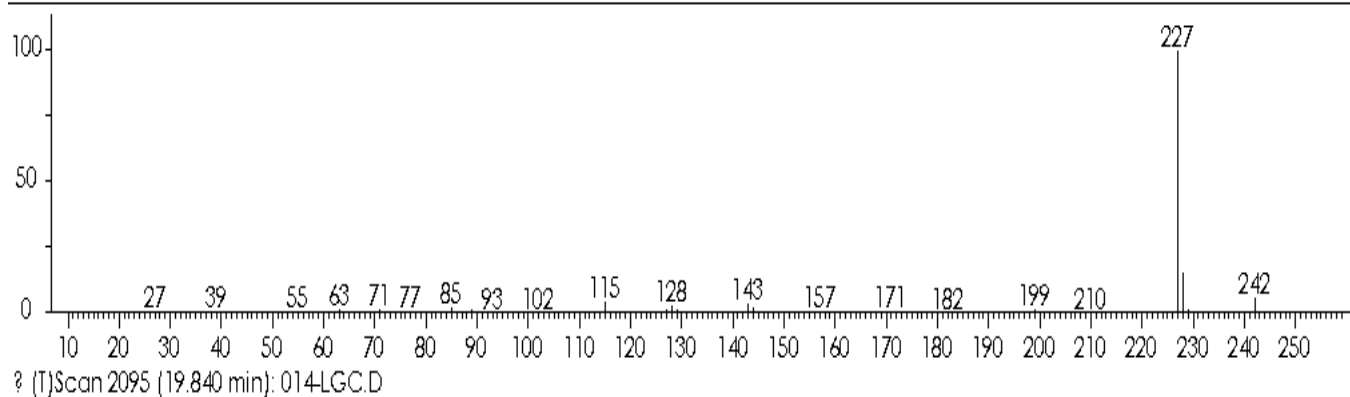

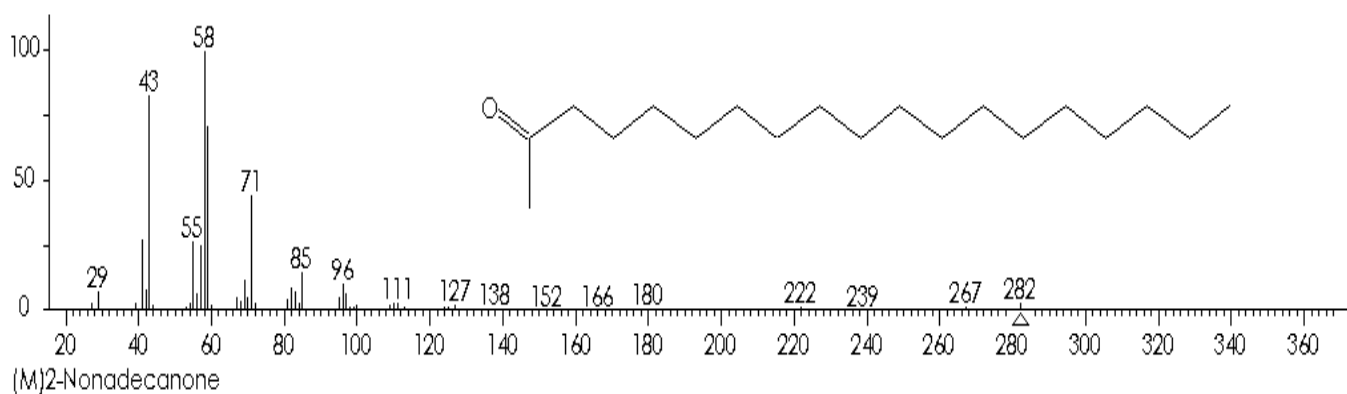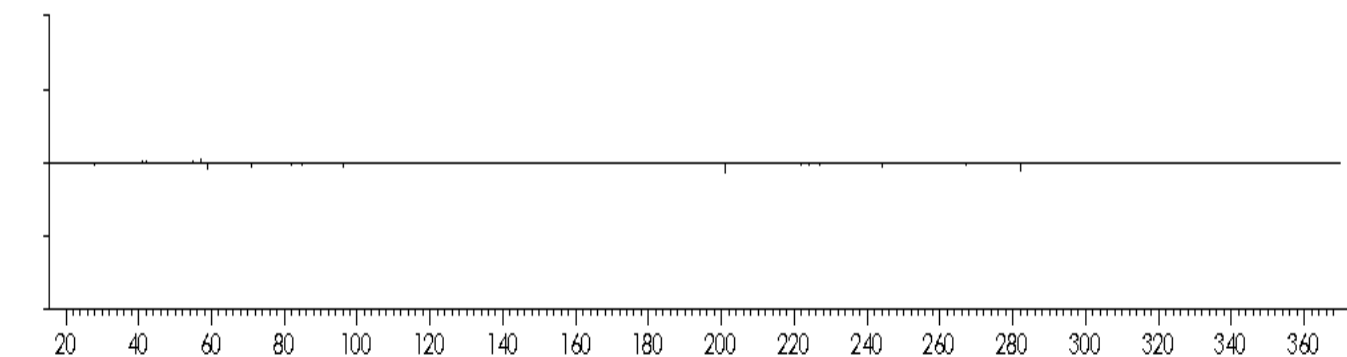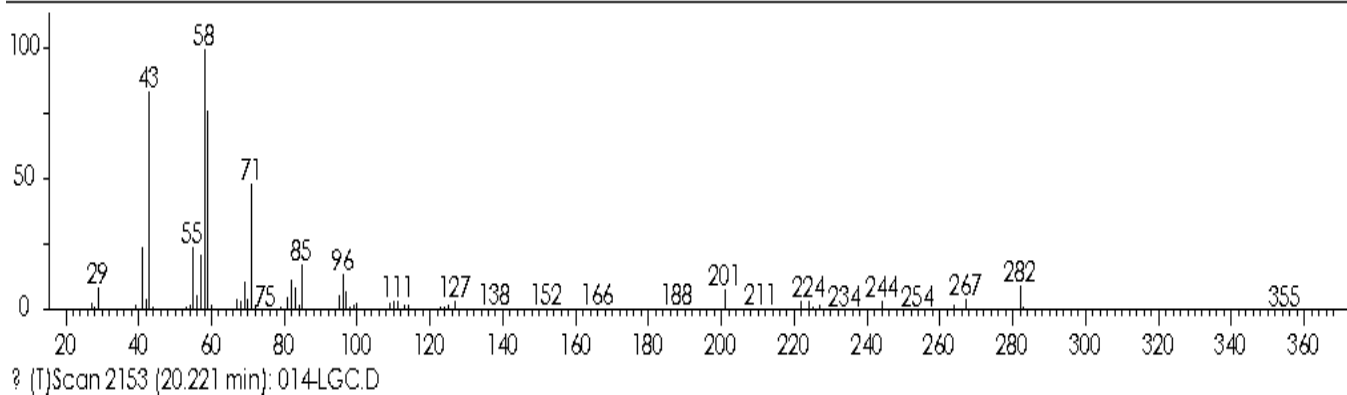

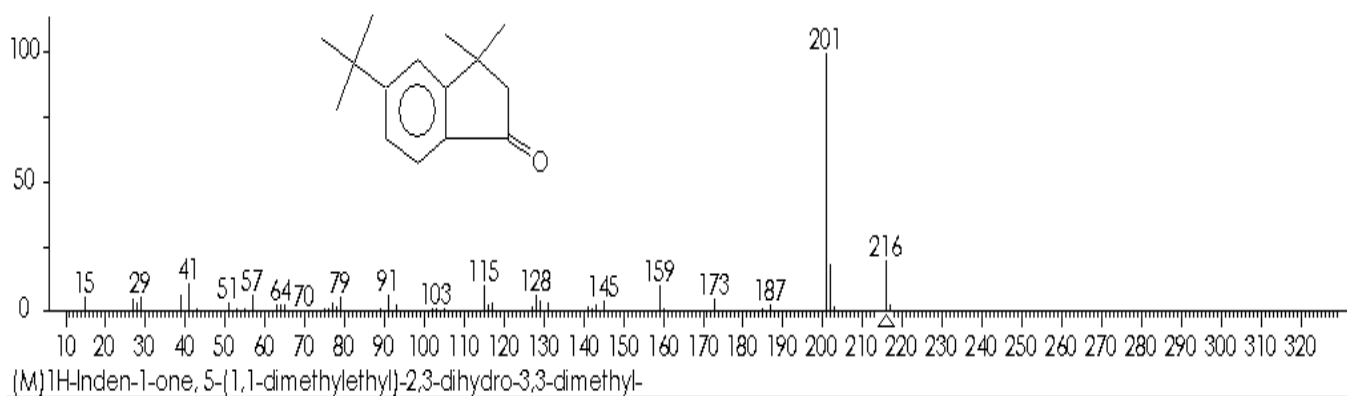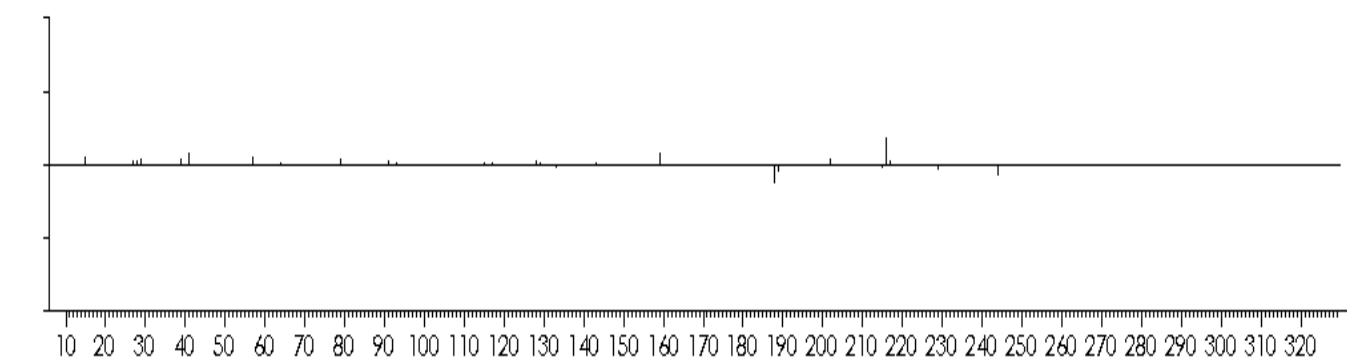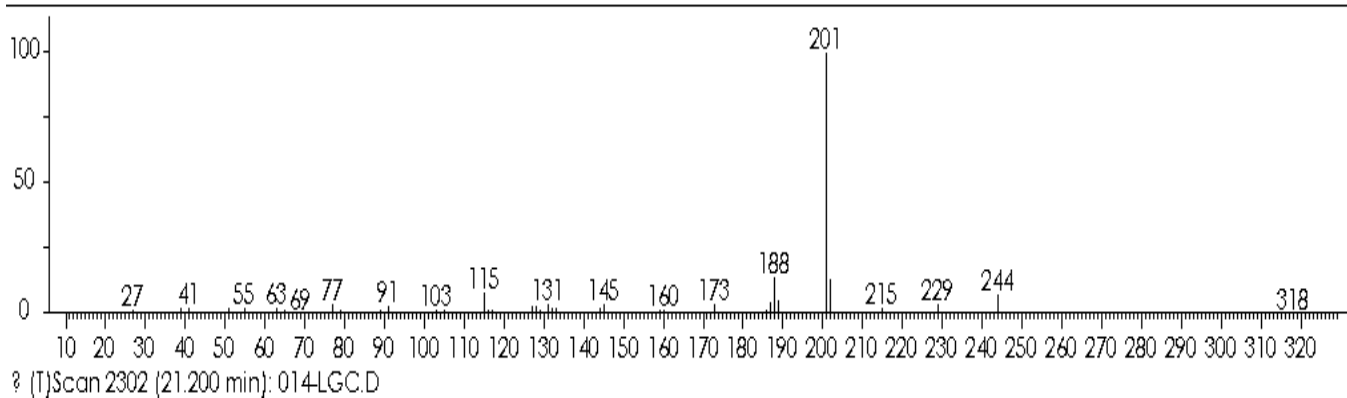

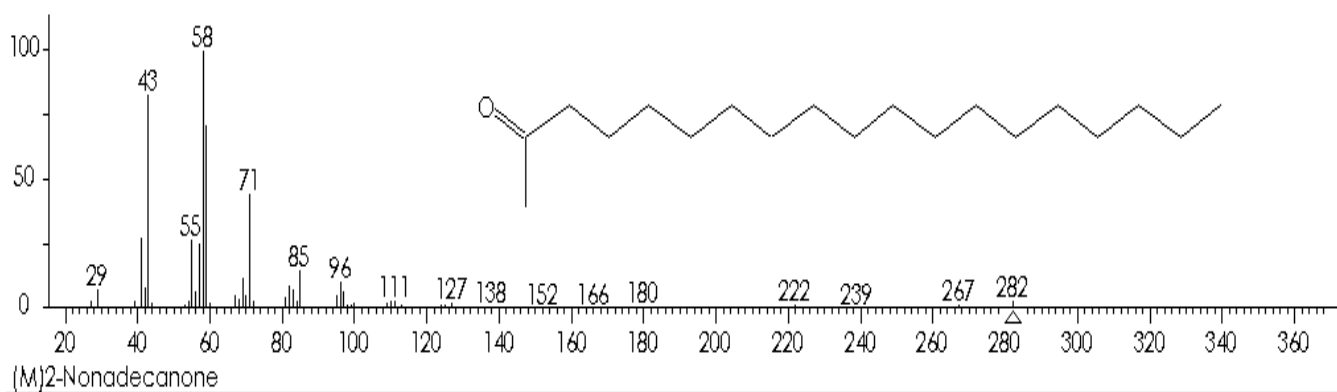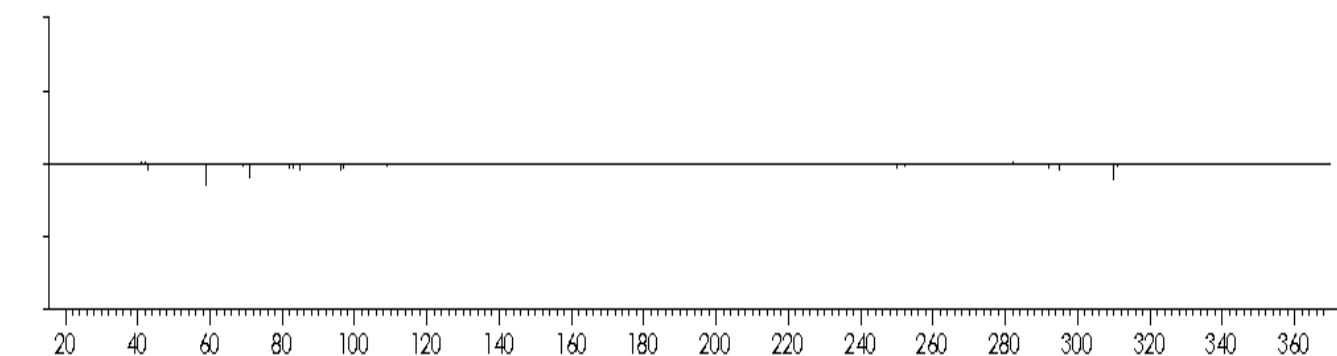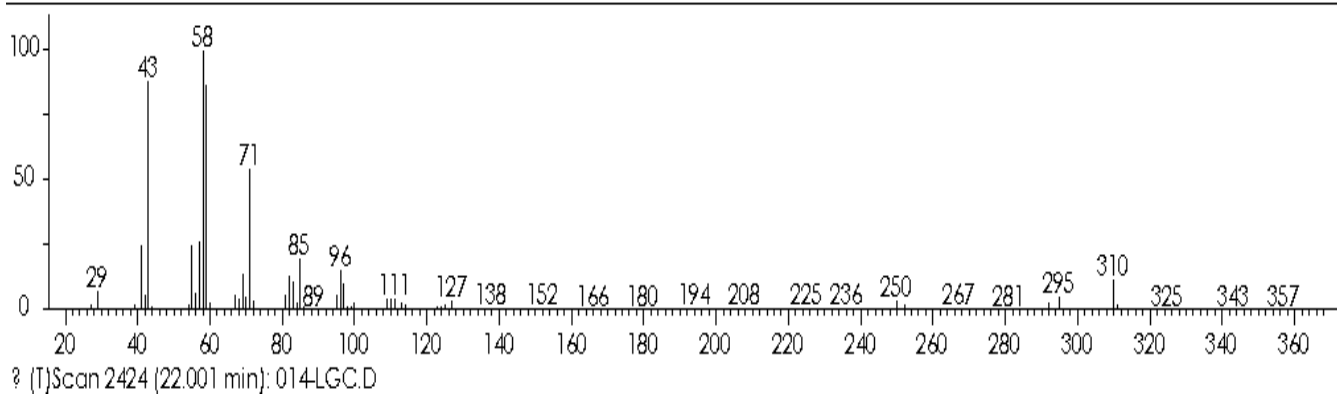

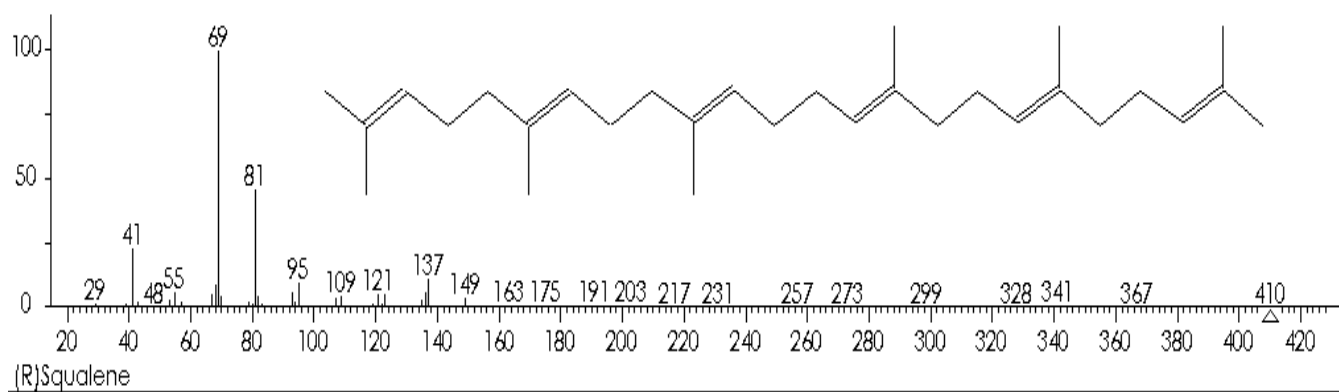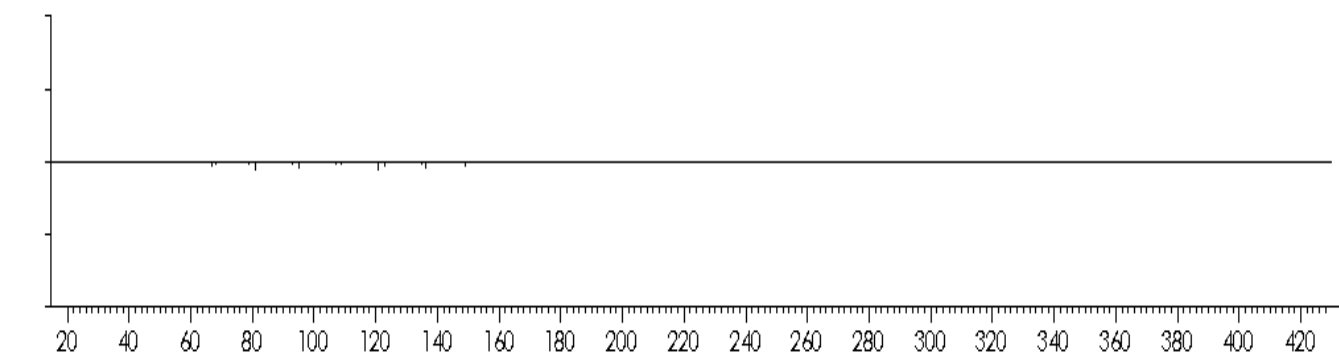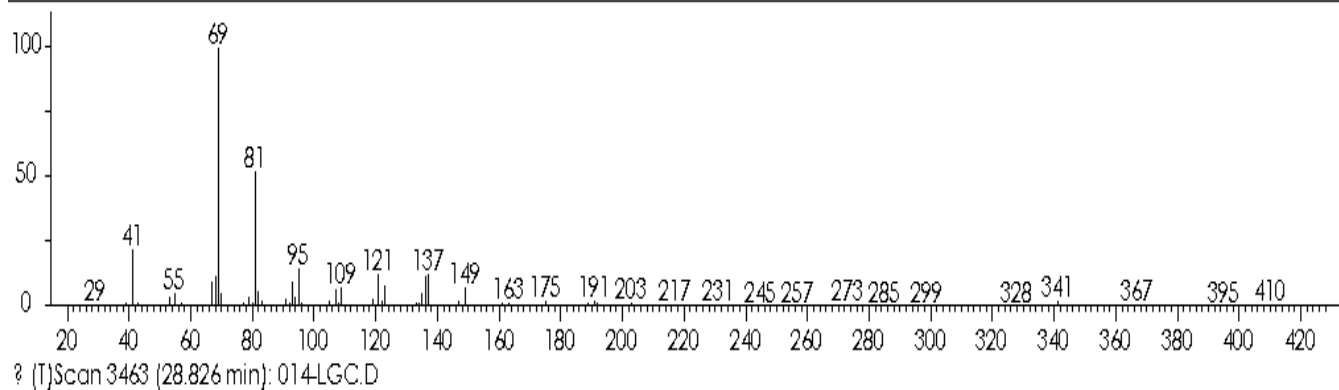



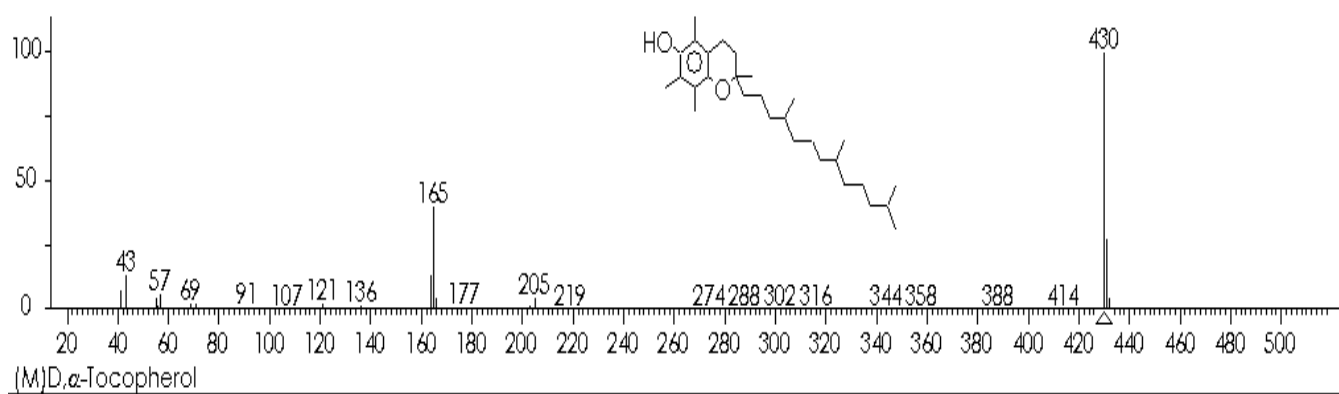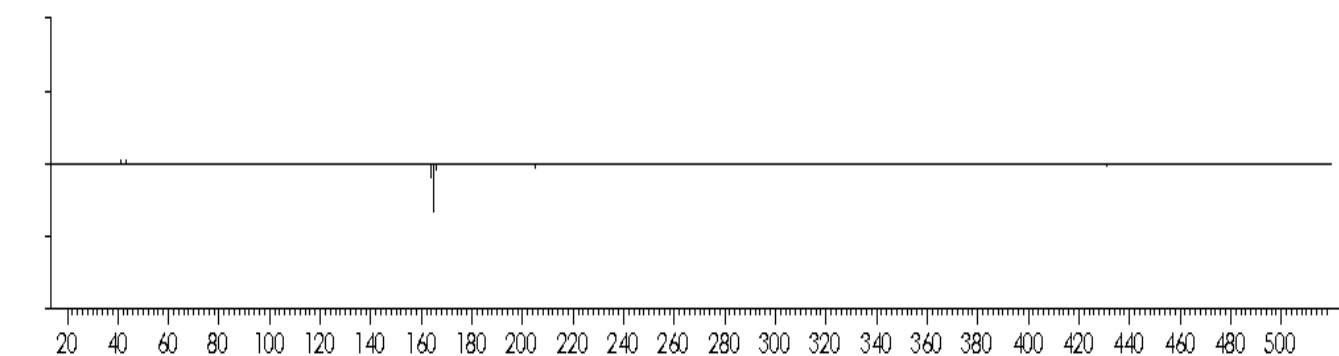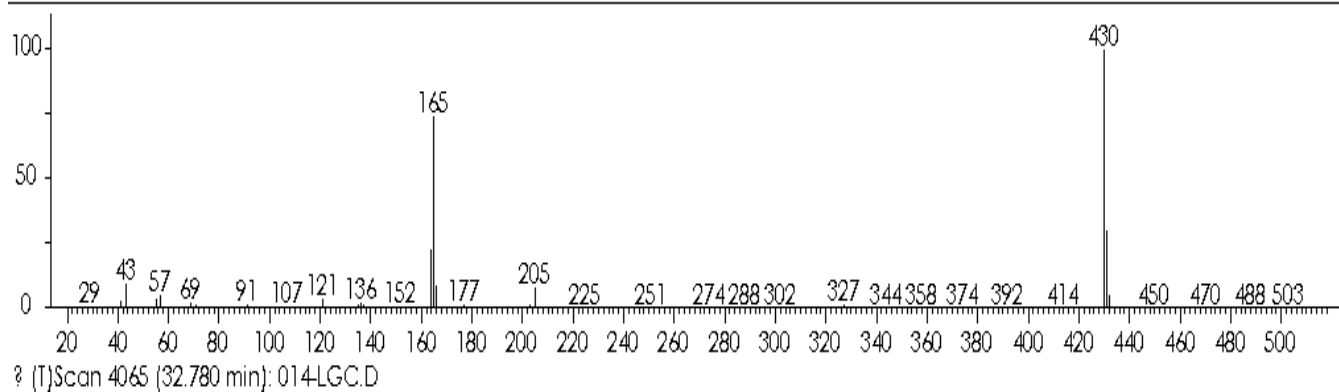

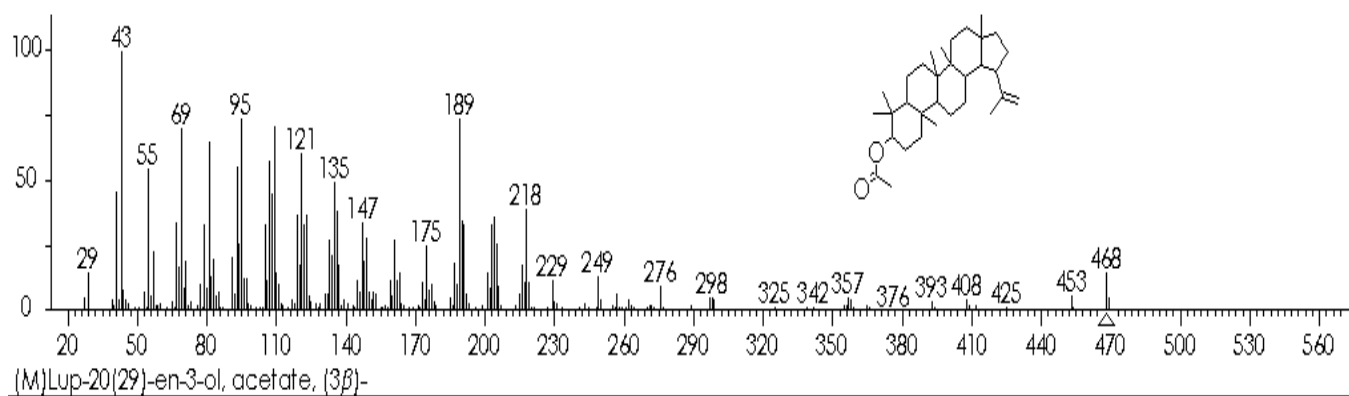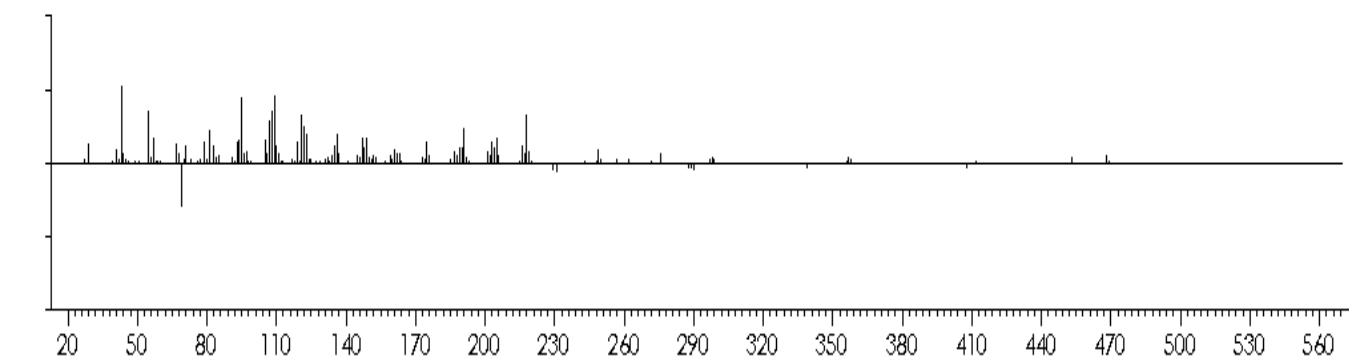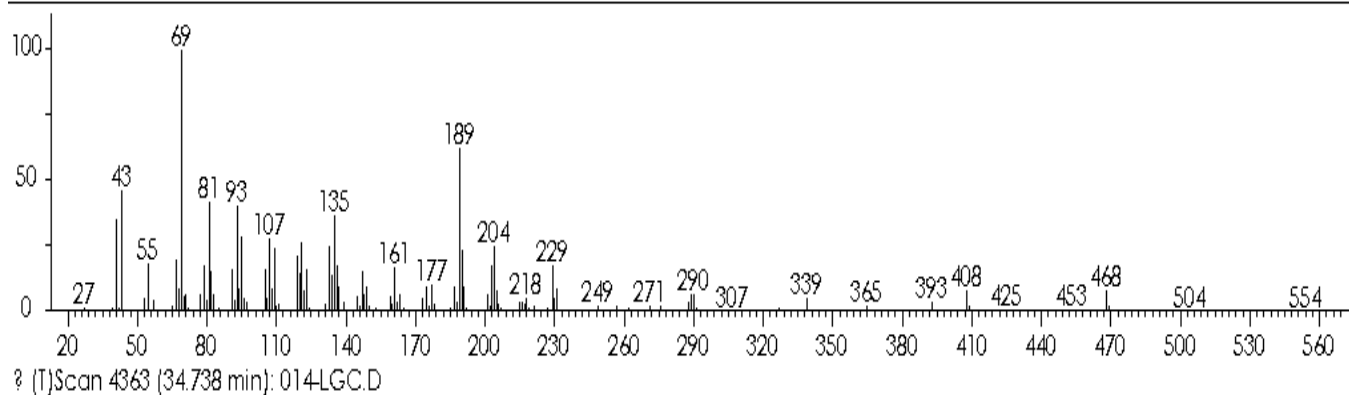

# Figure S2. GC-MS Analysis of the BtH extract

## Area Percent Report

Data File : C:\MSDCHEM\2\DATA\015-LGC.D Vial: 96  
 Acq On : 18 Oct 2022 11:15 Operator: M.G.M  
 Sample : BtzHex Splitless 40°C-1min, Inst : Instrumen  
 Misc : 10°C/min-250°C-5min,10°C/min-20min Multiplr: 1.00  
 Sample Amount: 1.00

MS Integration Params: autoint1.e

Signal : TIC

| peak # | R.T. min | first scan | max scan | last scan | PK TY | peak height | corr. area | corr. % max. | % of total |
|--------|----------|------------|----------|-----------|-------|-------------|------------|--------------|------------|
| 1      | 18.493   | 1870       | 1890     | 1910      | BB    | 1054859     | 23320727   | 7.17%        | 3.216%     |
| 2      | 19.150   | 1986       | 1990     | 1994      | M     | 371667      | 5936264    | 1.83%        | 0.819%     |
| 3      | 20.122   | 2133       | 2138     | 2142      | M     | 1521626     | 25098555   | 7.72%        | 3.462%     |
| 4      | 20.175   | 2143       | 2146     | 2150      | M3    | 988264      | 18038391   | 5.55%        | 2.488%     |
| 5      | 20.398   | 2176       | 2180     | 2185      | M     | 284165      | 4668471    | 1.44%        | 0.644%     |
| 6      | 20.727   | 2224       | 2230     | 2234      | M     | 513857      | 8499903    | 2.61%        | 1.172%     |
| 7      | 20.773   | 2235       | 2237     | 2245      | M2    | 478580      | 10314151   | 3.17%        | 1.422%     |
| 8      | 22.474   | 2473       | 2496     | 2508      | BB    | 1397806     | 27913041   | 8.58%        | 3.850%     |
| 9      | 22.907   | 2558       | 2562     | 2568      | M2    | 244262      | 4606328    | 1.42%        | 0.635%     |
| 10     | 26.704   | 3120       | 3140     | 3164      | BB 3  | 500167      | 24591938   | 7.56%        | 3.392%     |
| 11     | 28.845   | 3446       | 3466     | 3496      | BB    | 4676899     | 145442645  | 44.72%       | 20.059%    |
| 12     | 29.719   | 3580       | 3599     | 3616      | BB    | 811542      | 20855076   | 6.41%        | 2.876%     |
| 13     | 32.681   | 4025       | 4050     | 4122      | BB    | 6757043     | 325236826  | 100.00%      | 44.855%    |
| 14     | 35.657   | 4479       | 4503     | 4536      | BB 4  | 575766      | 35057274   | 10.78%       | 4.835%     |
| 15     | 44.774   | 5878       | 5891     | 5920      | M4    | 480756      | 45497576   | 13.99%       | 6.275%     |

Sum of corrected areas: 725077165

Abundance

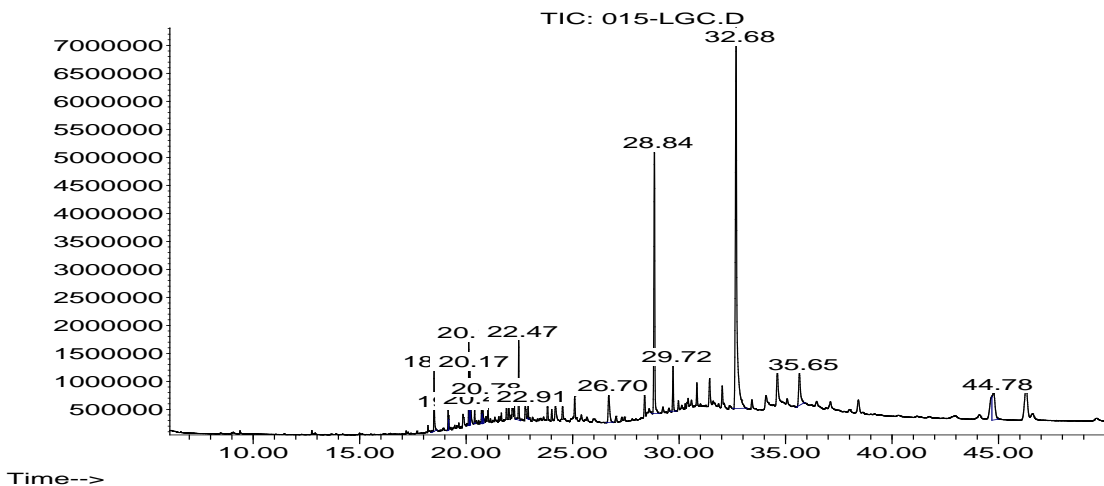

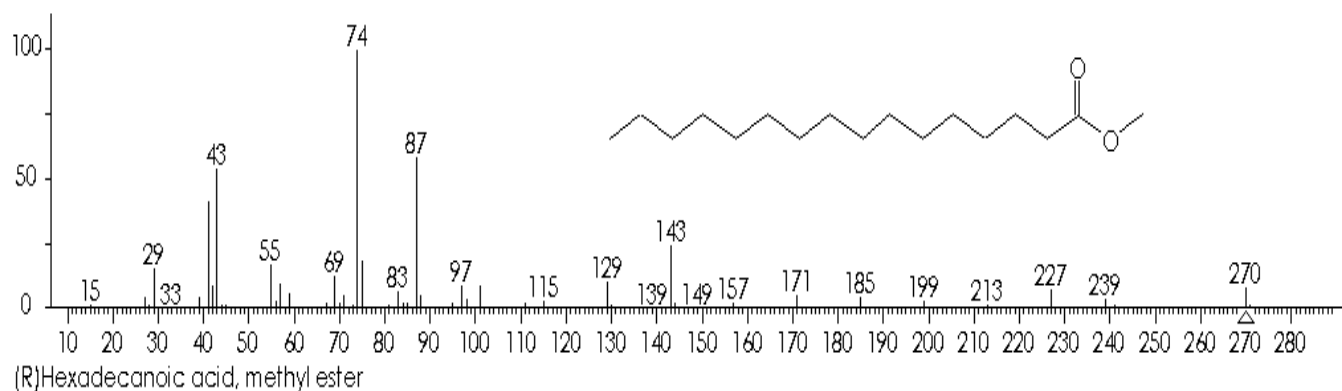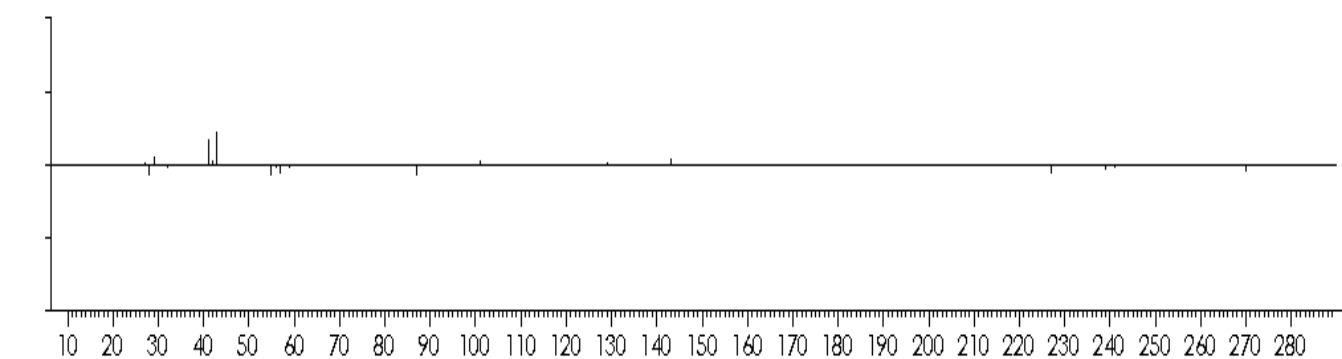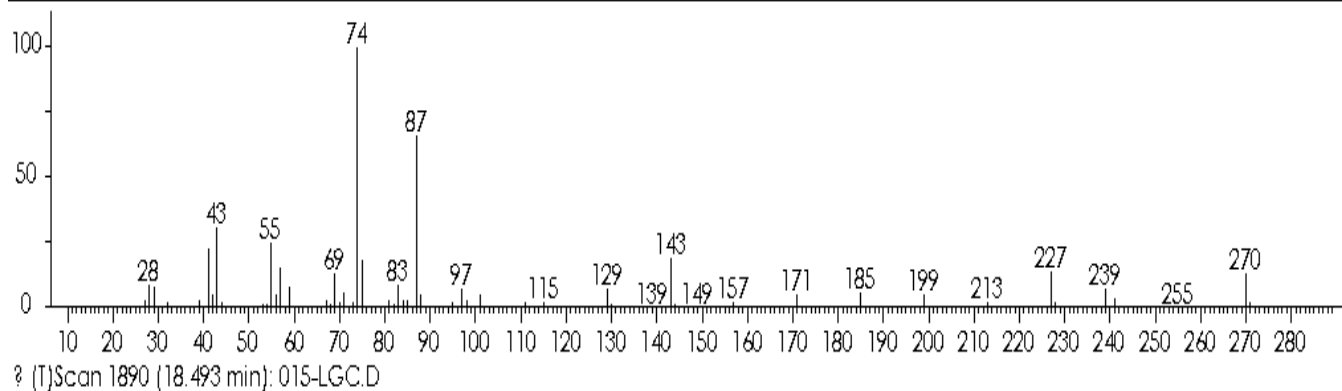

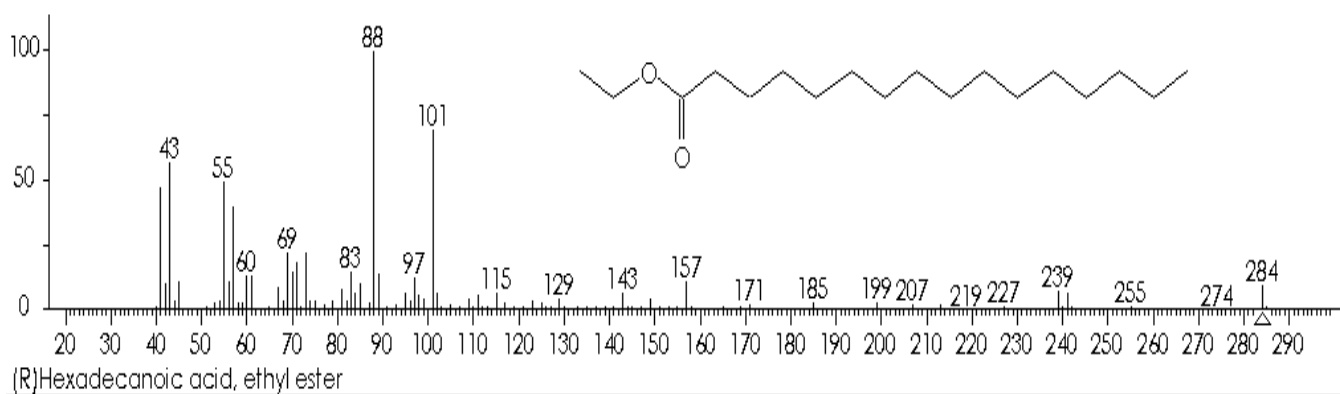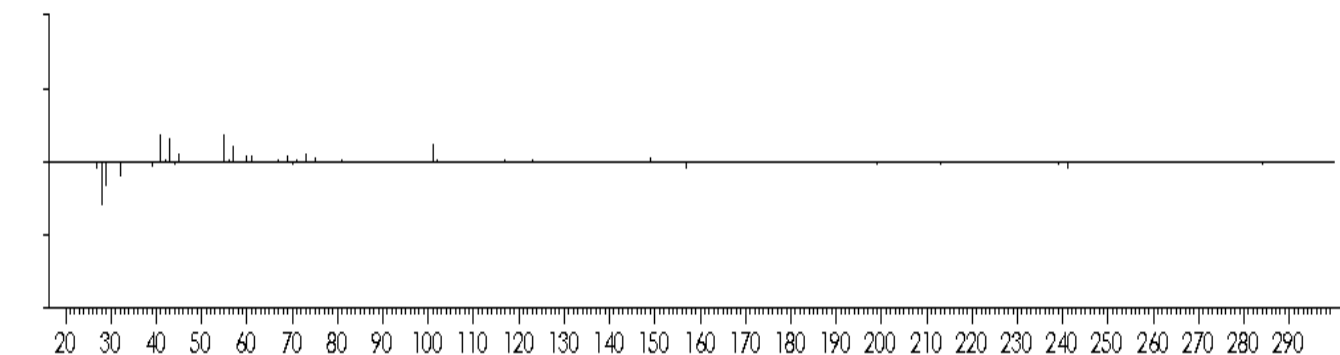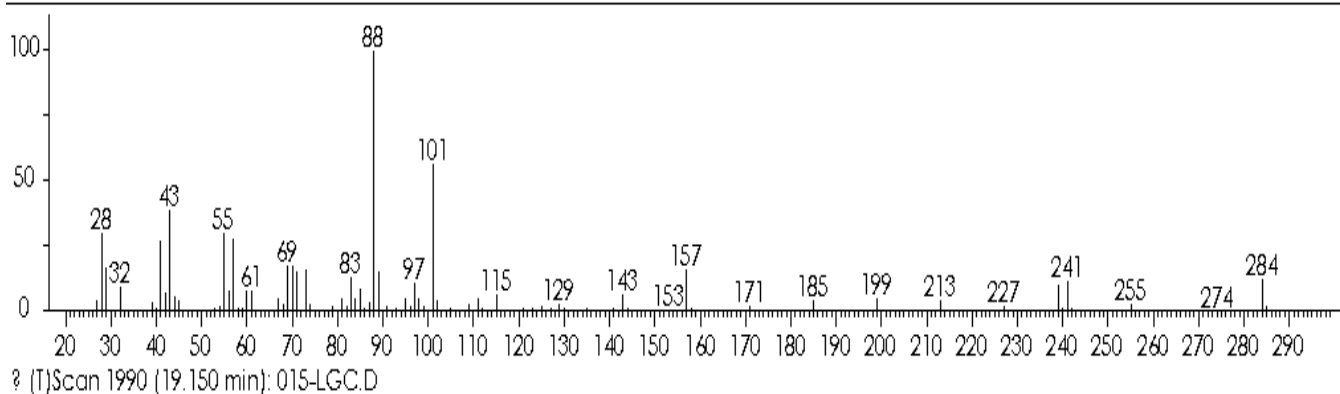

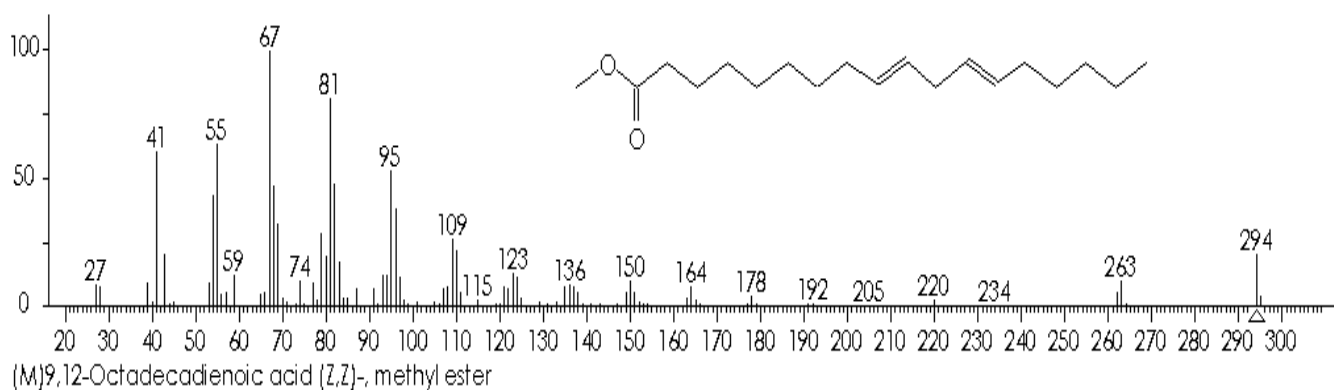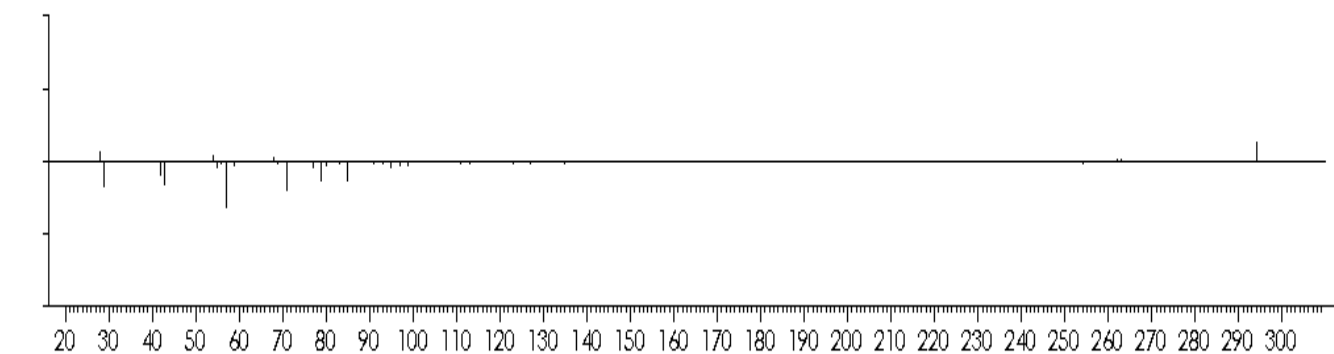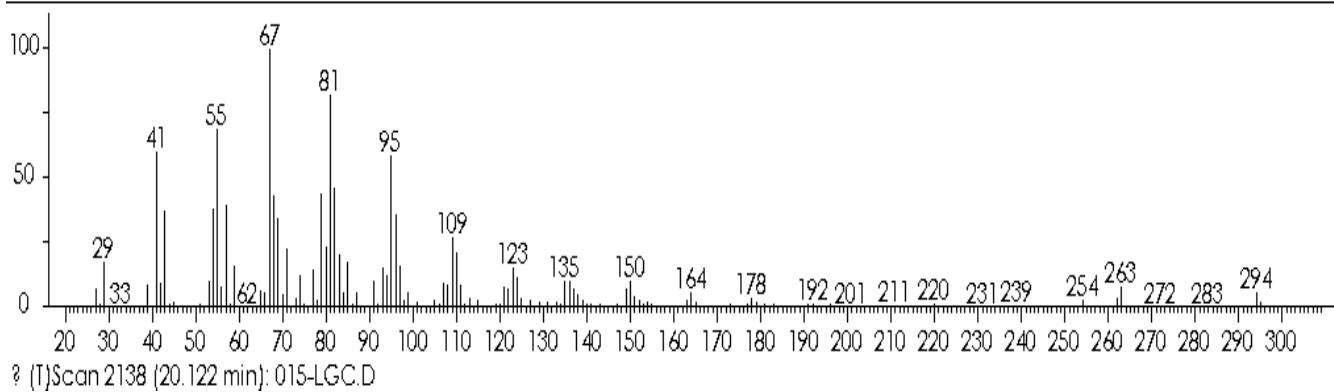

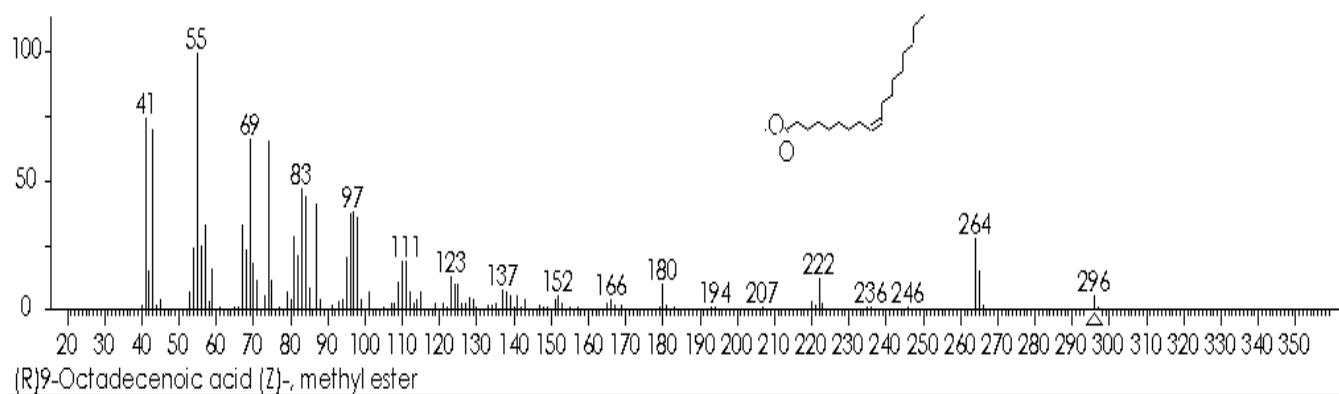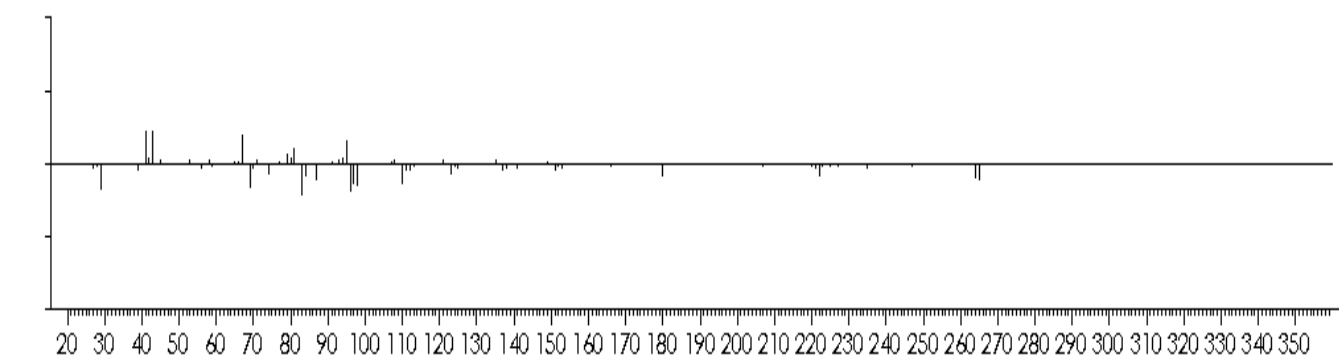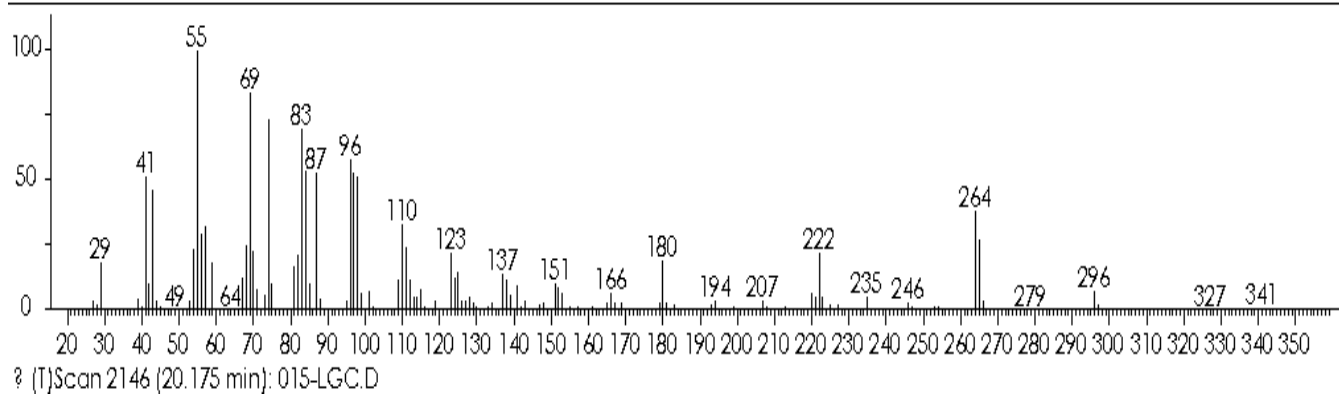

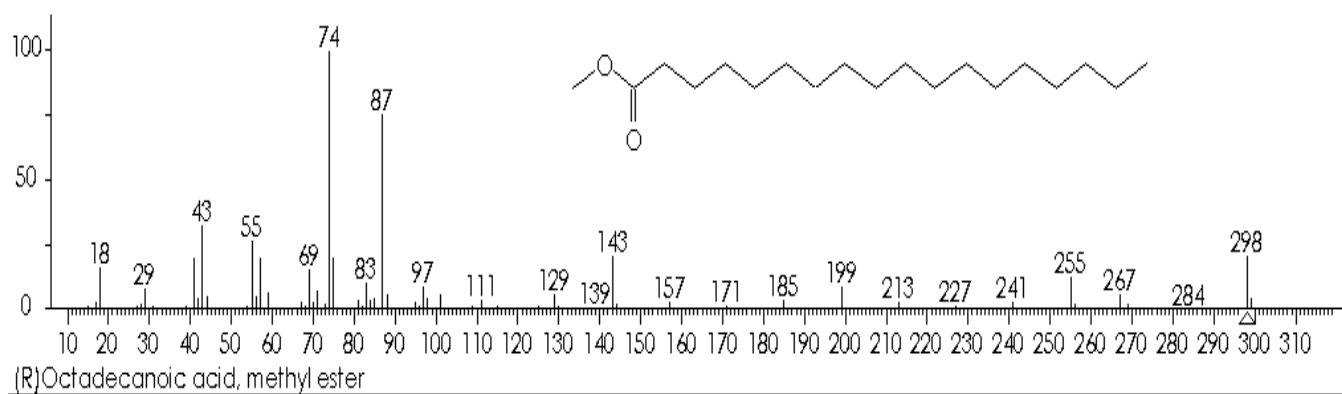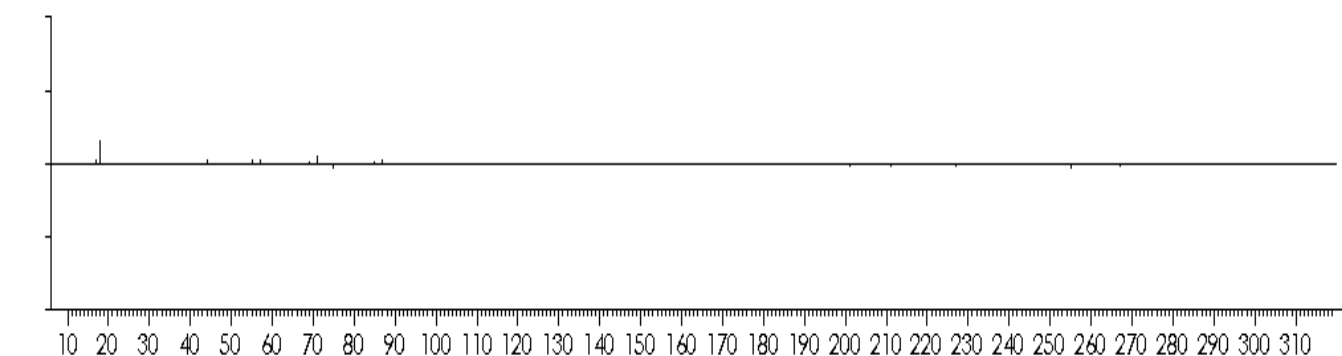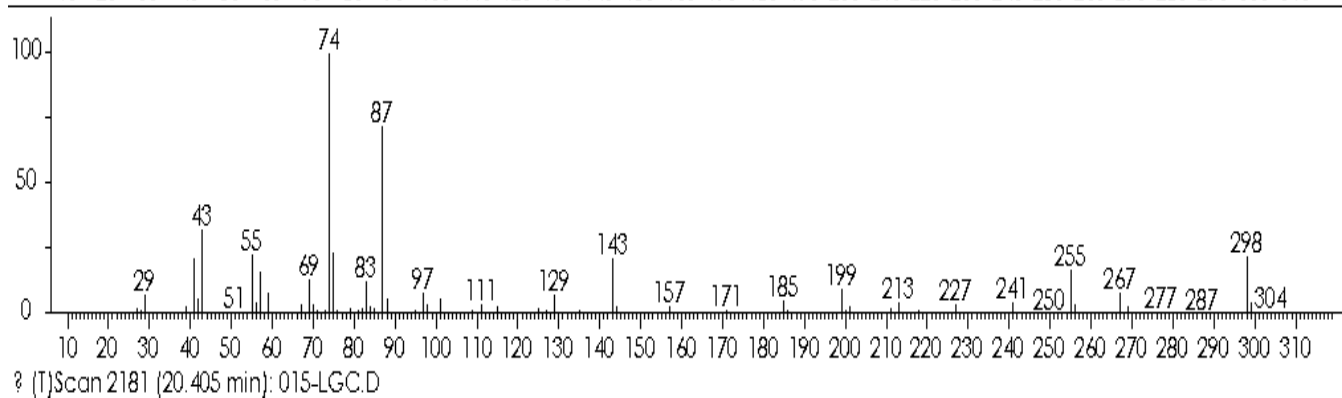



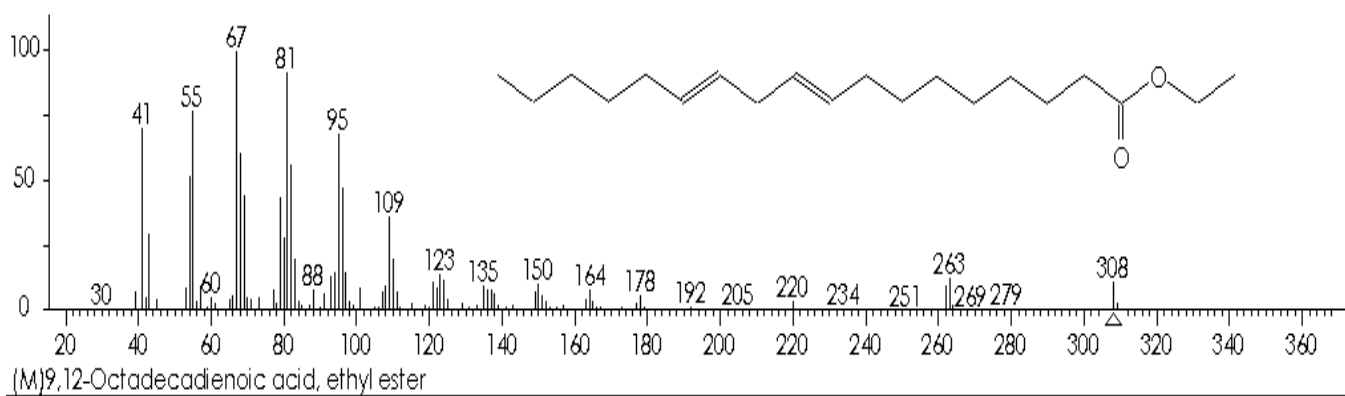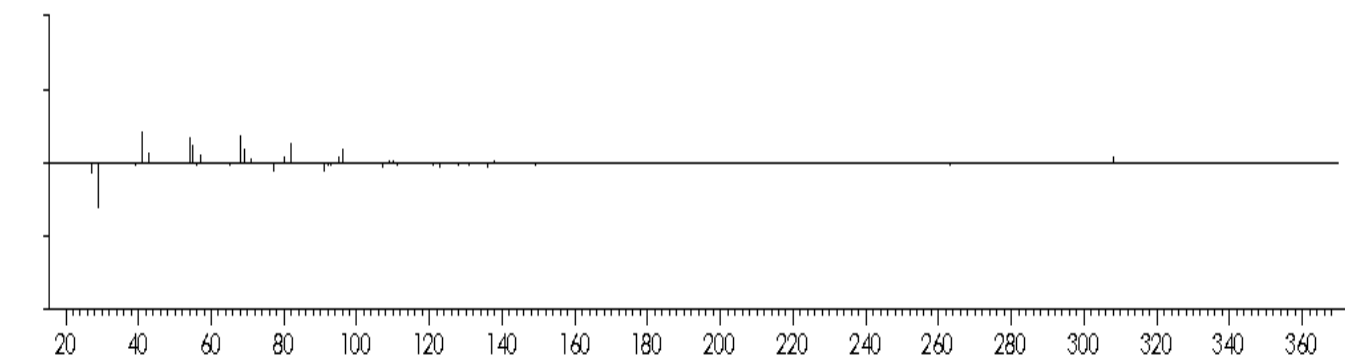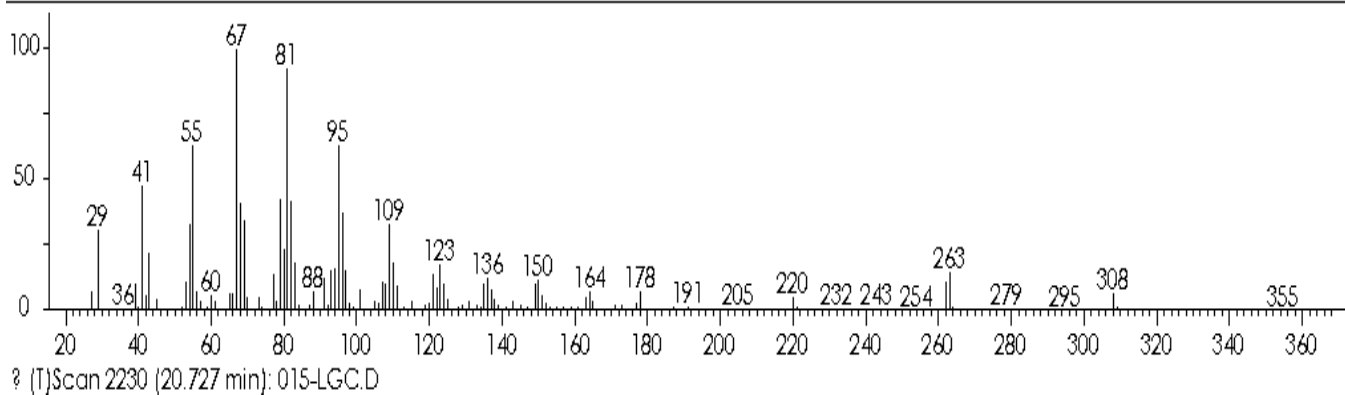

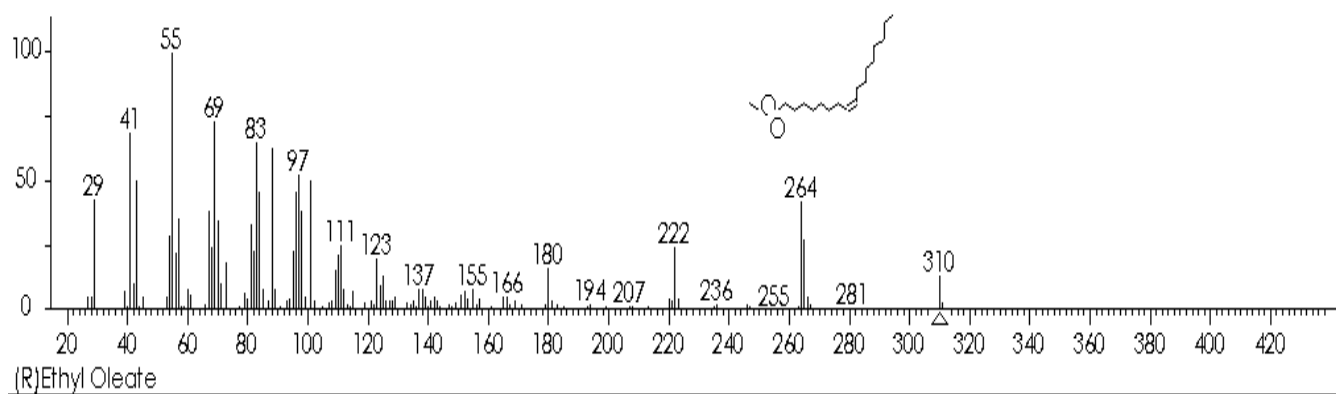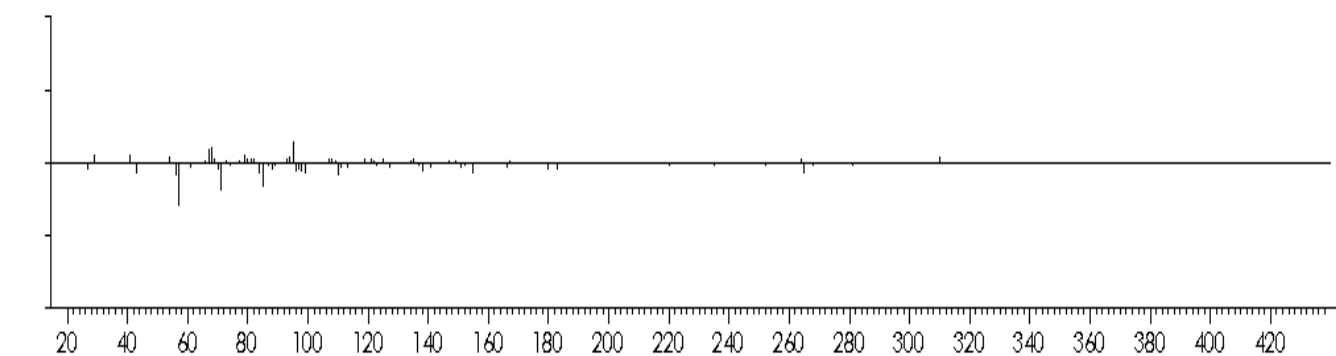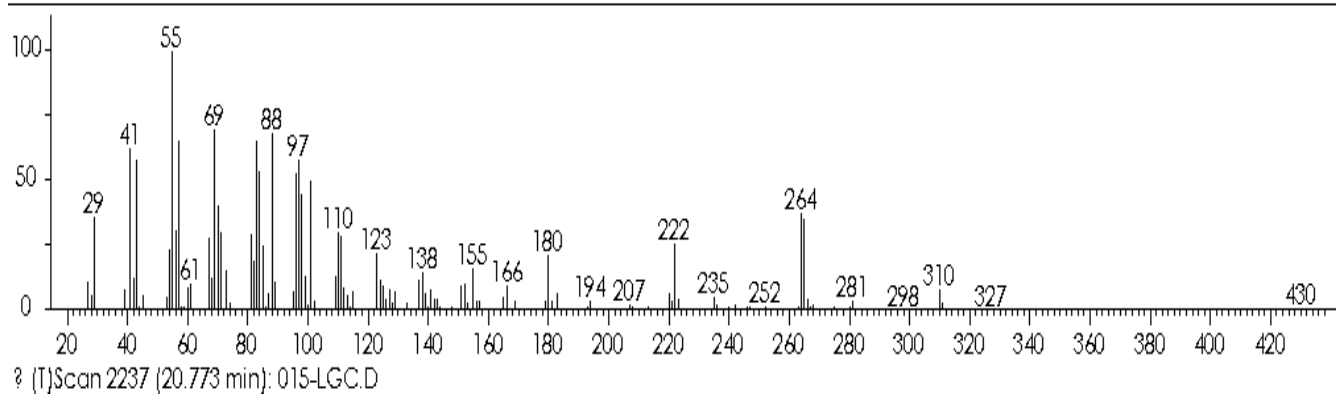

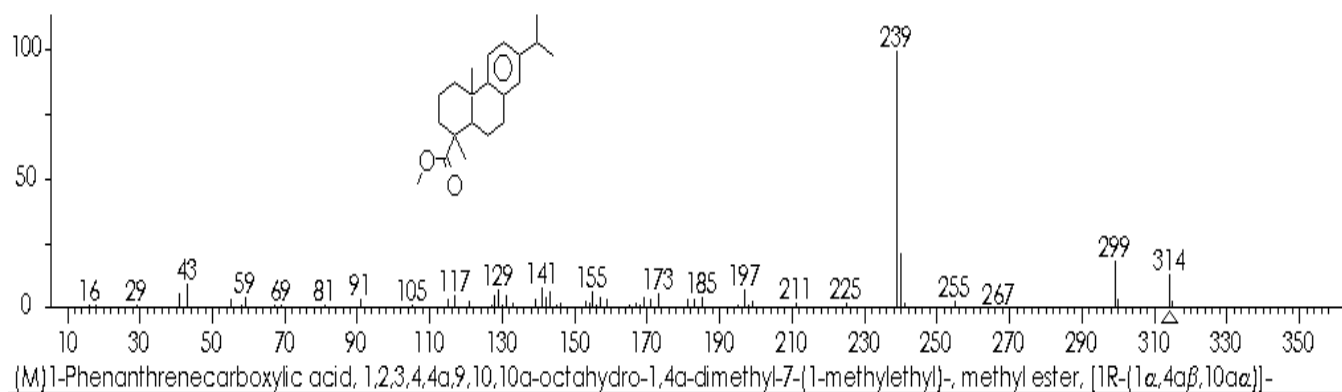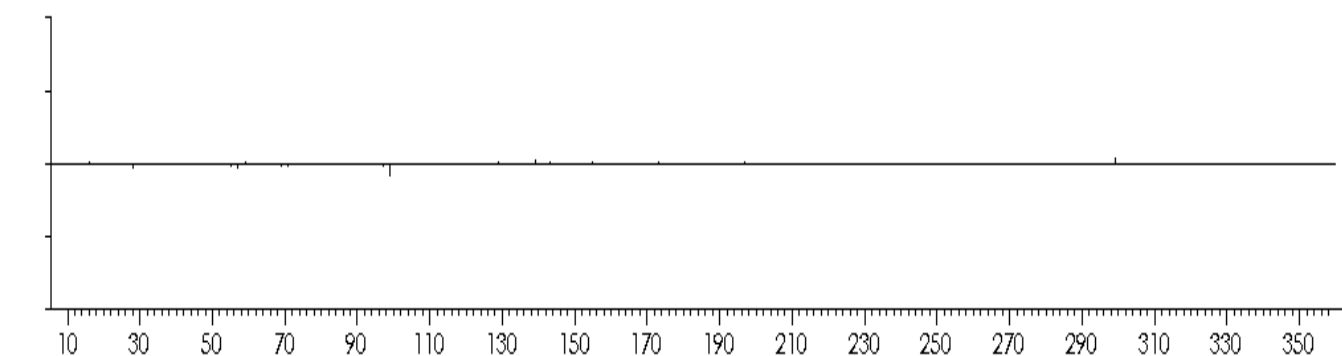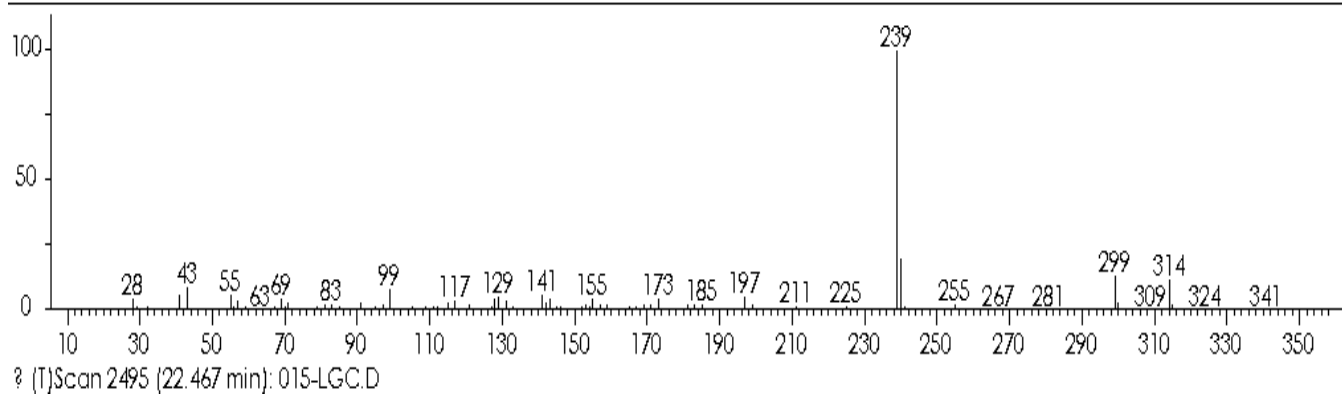

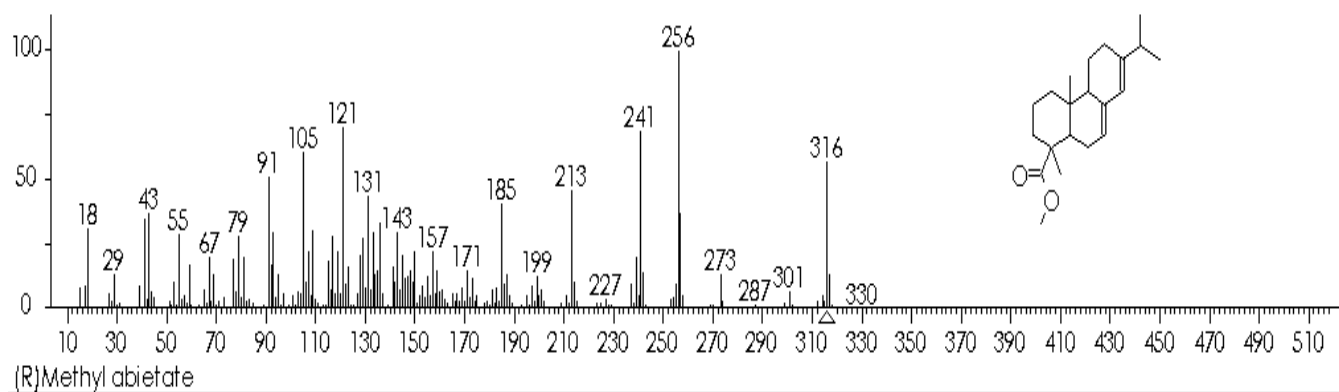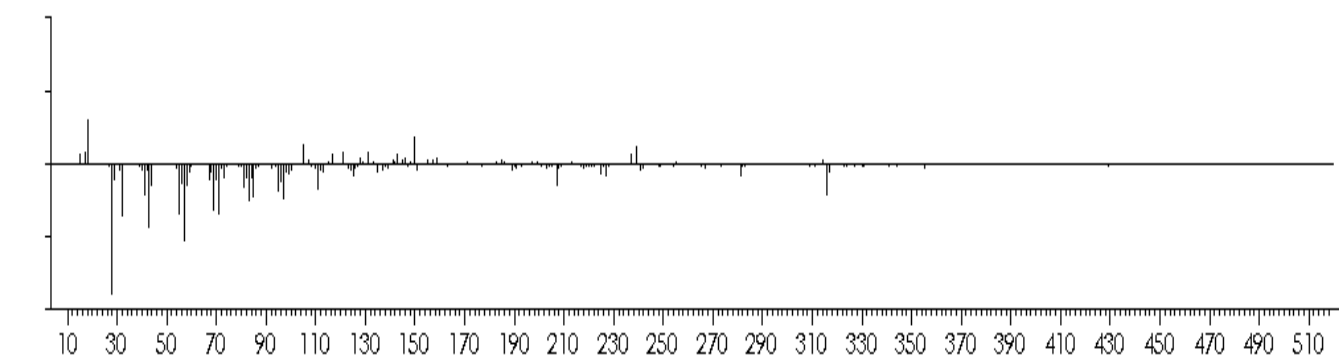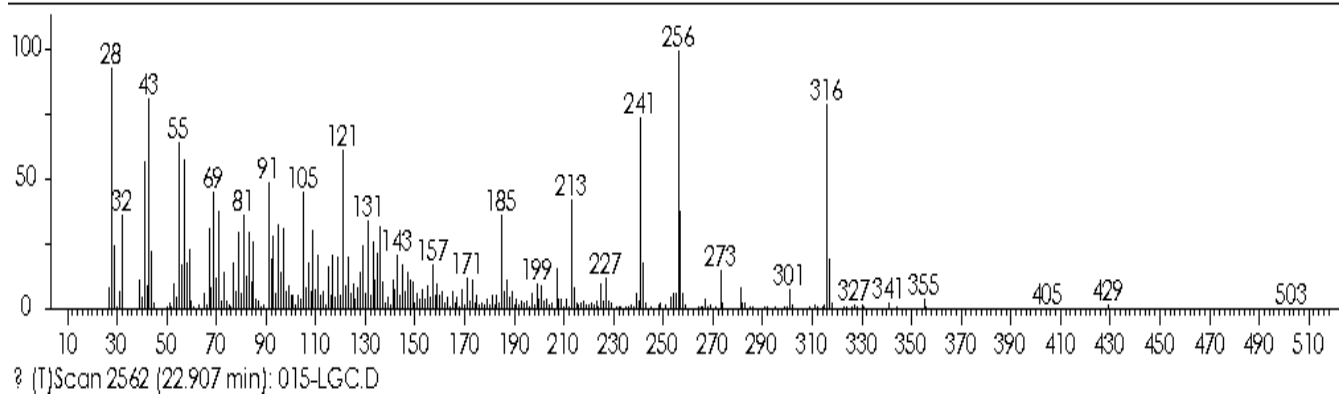

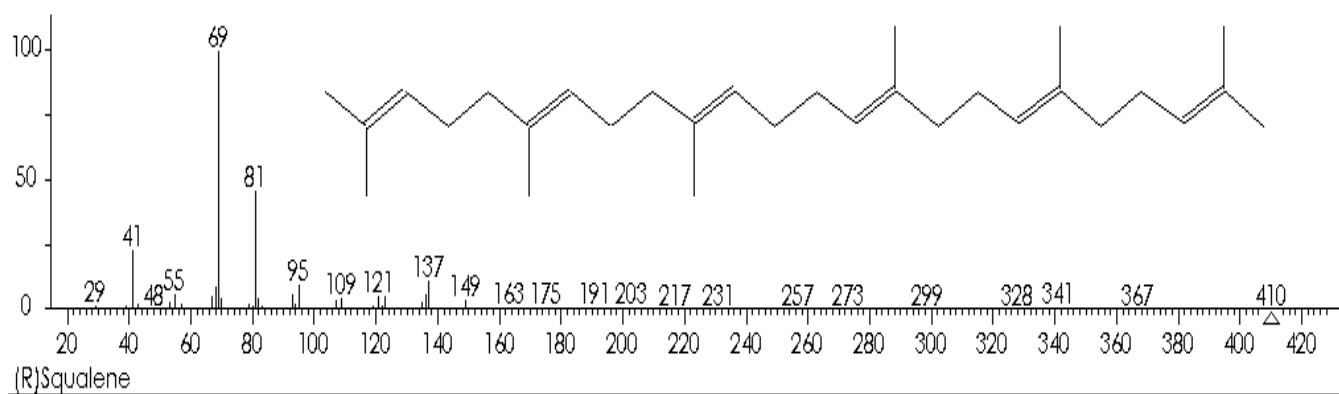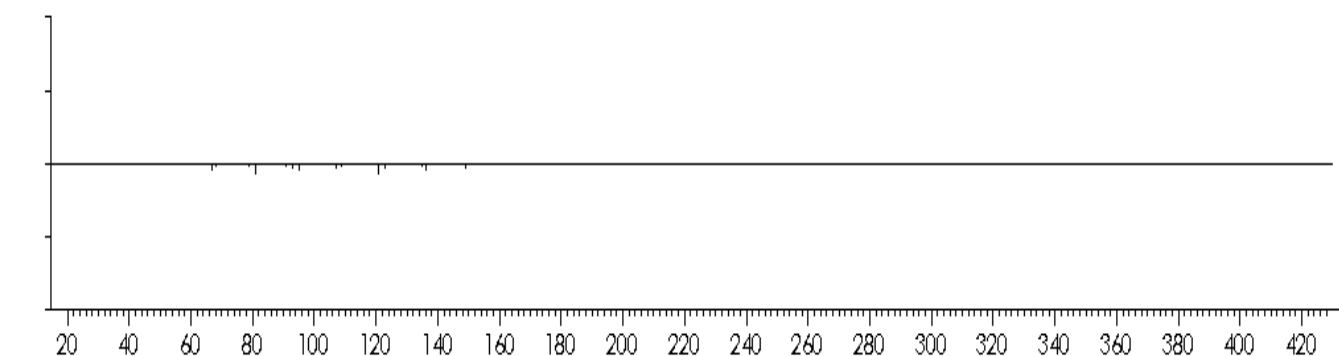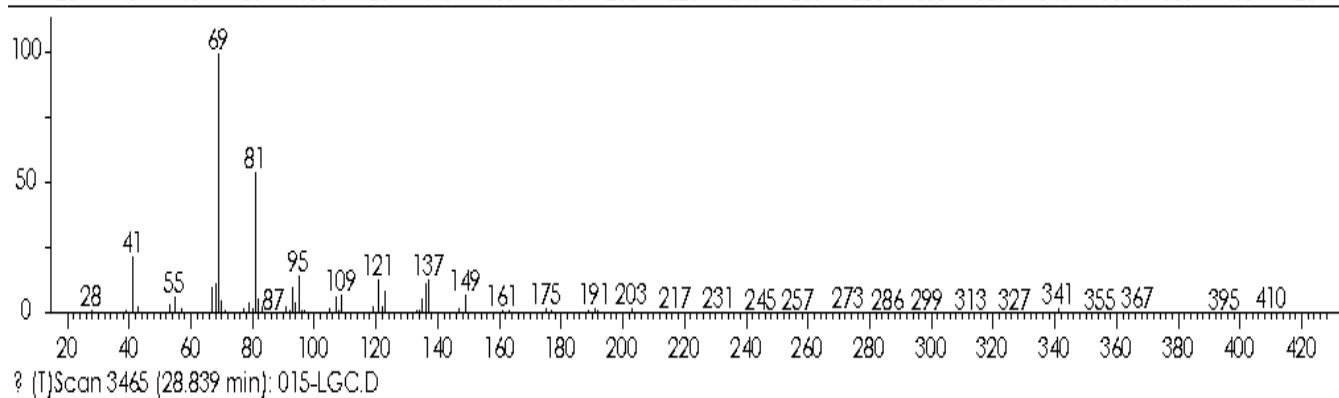

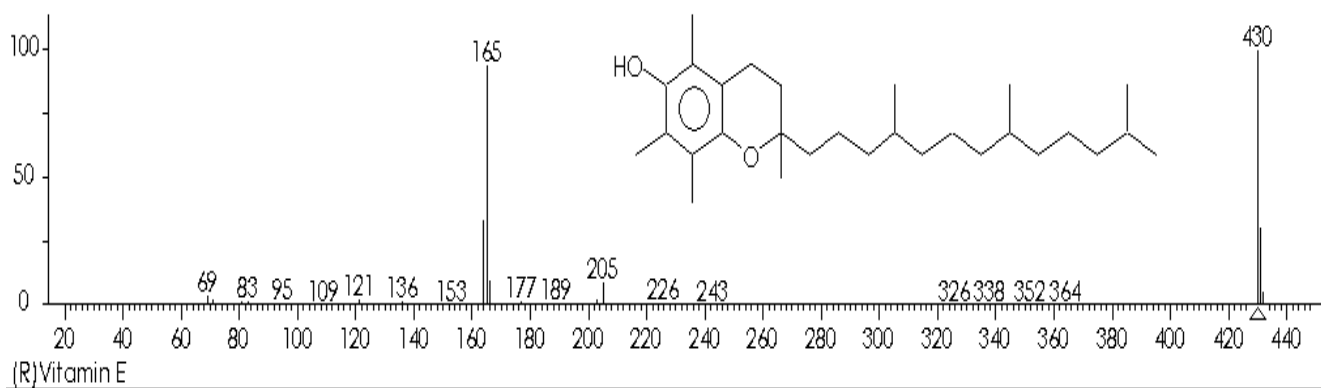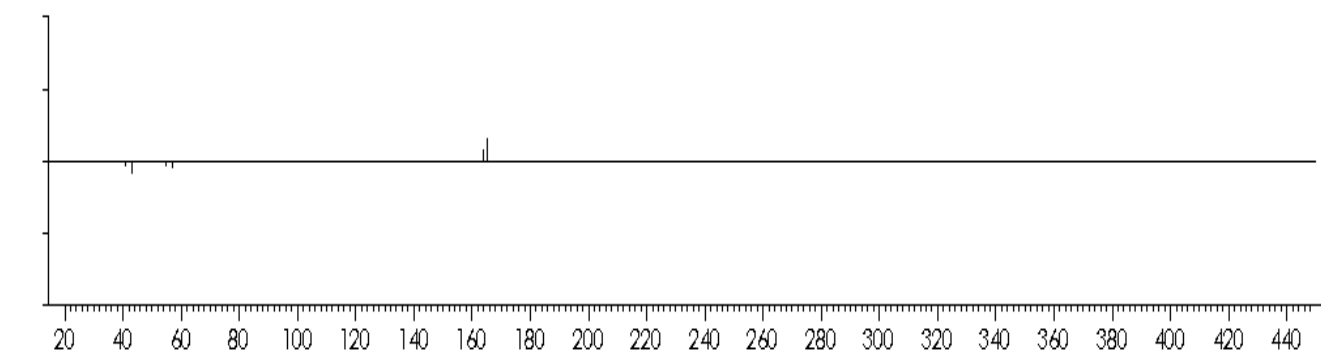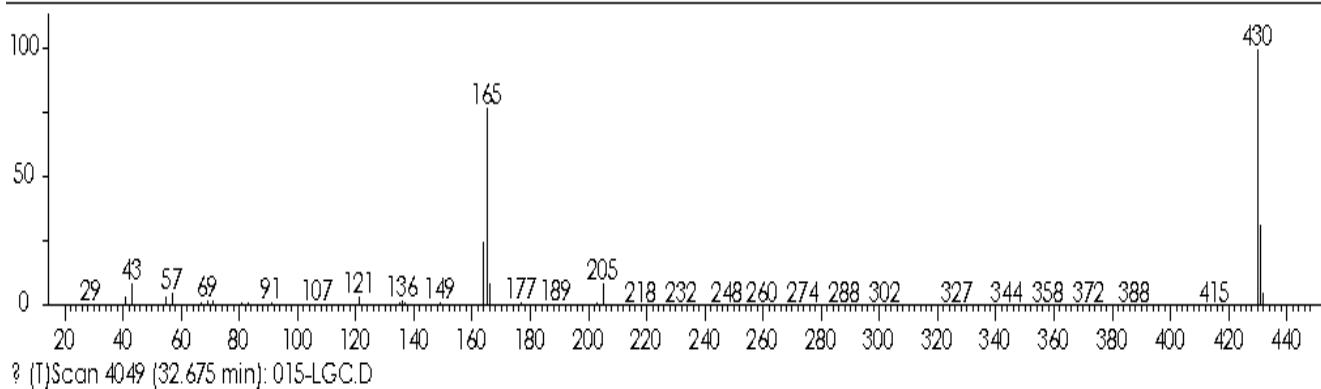

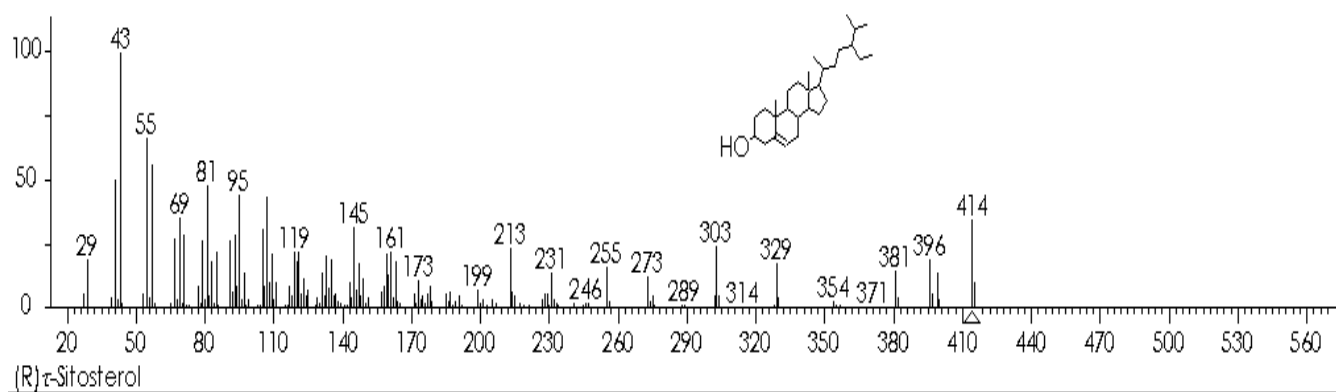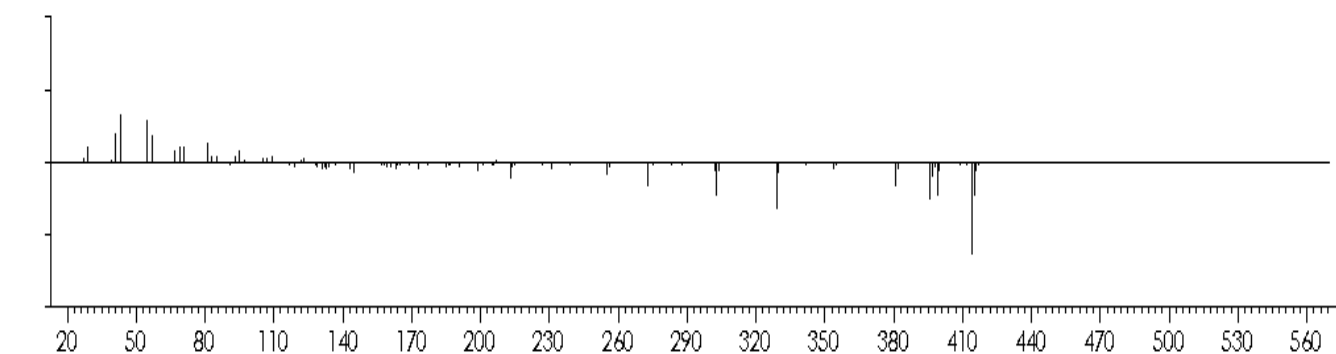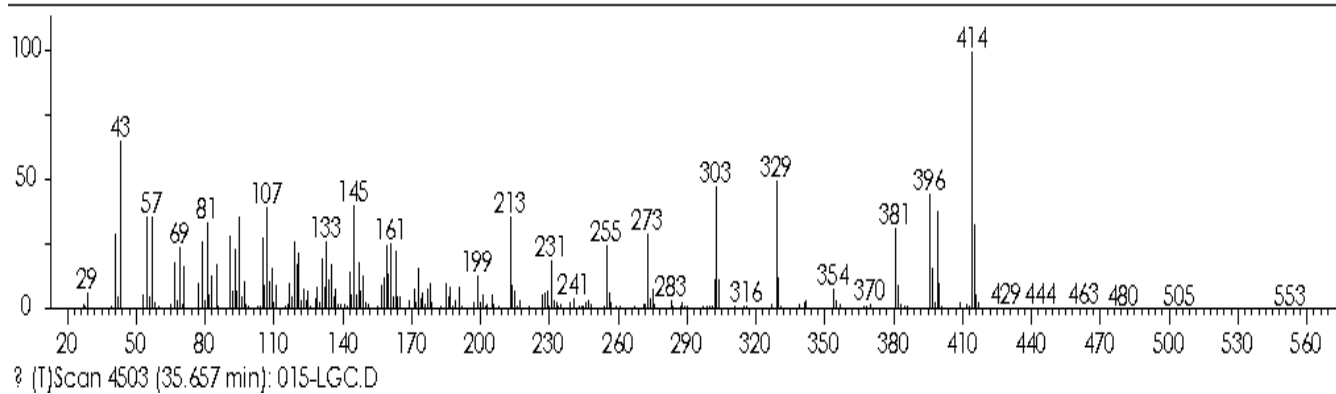

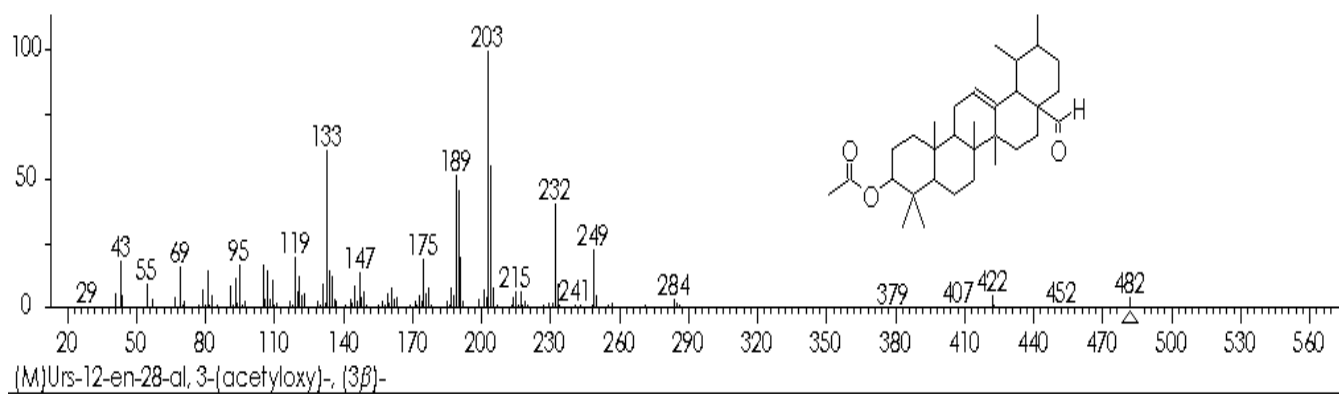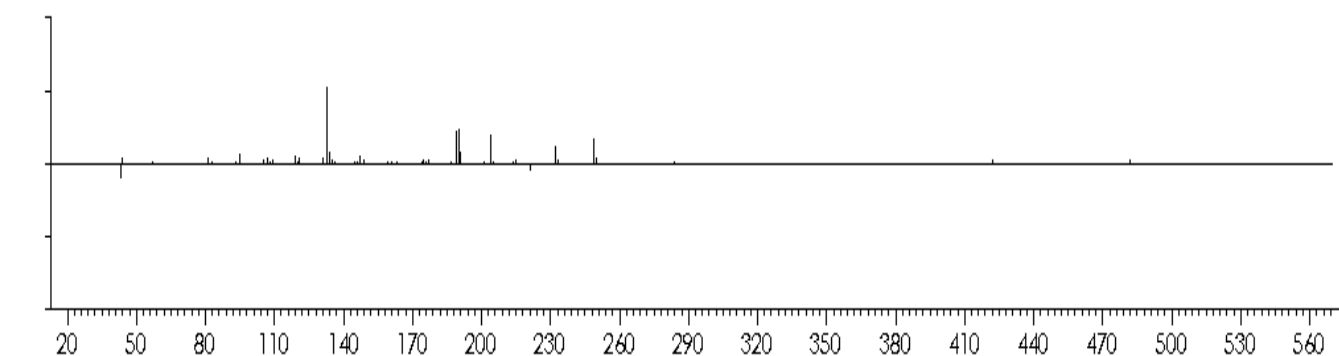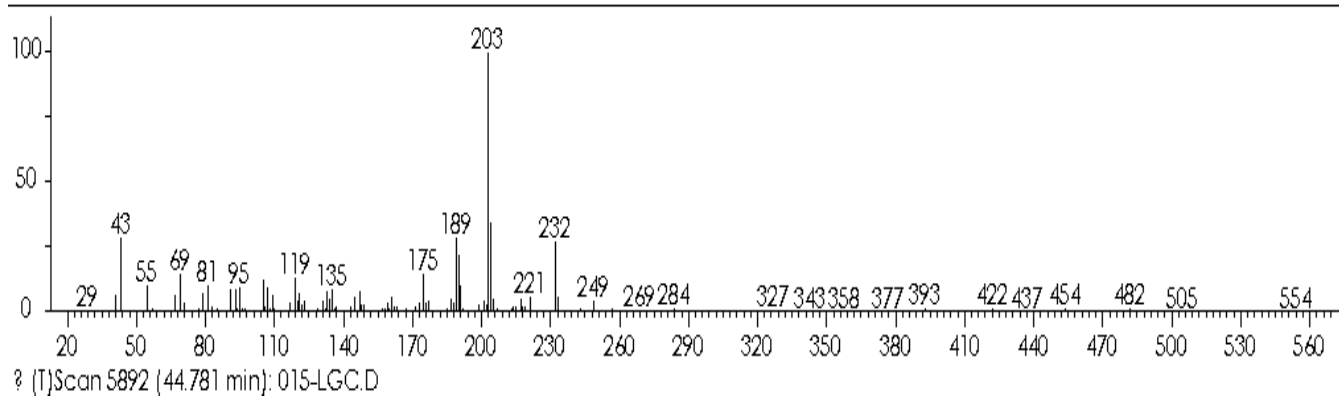



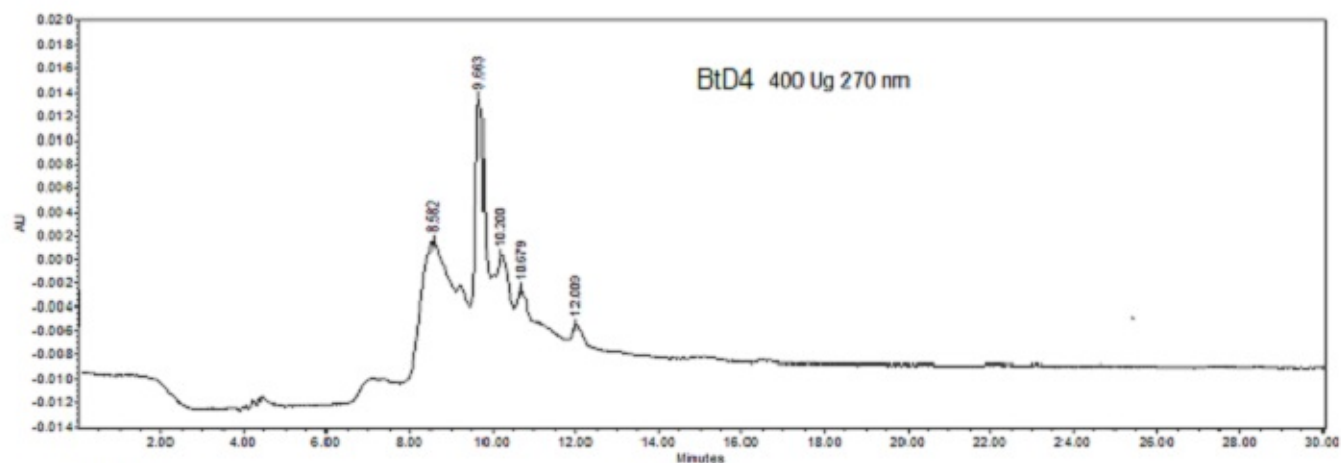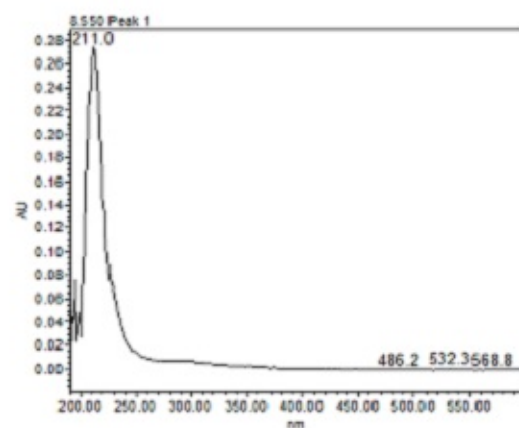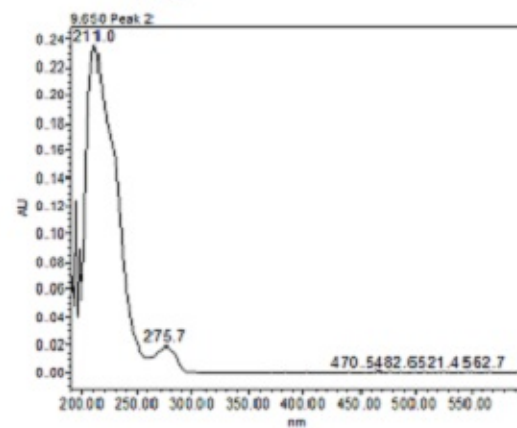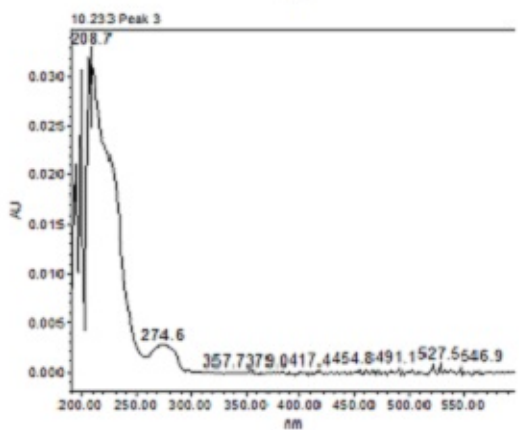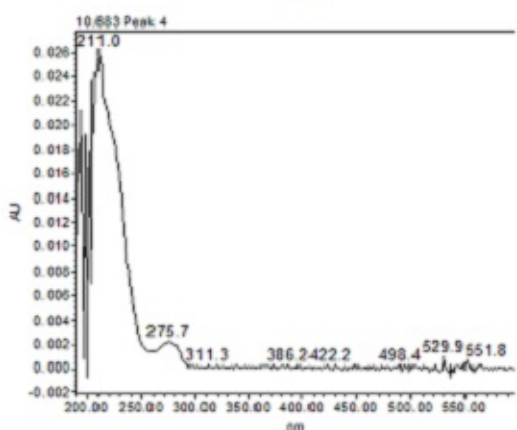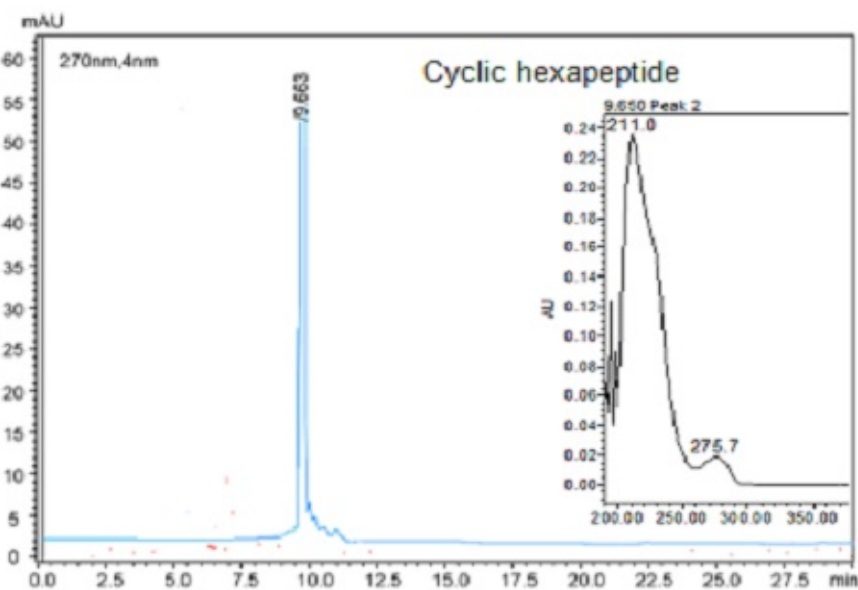

Figure S3. Spectrum UV and HPLC of cyclic hexapeptide

DOLESTEROL 3073\_02Mar2350 73 (3.684) Cm (73)

4: MS2 ES+  
6.68e5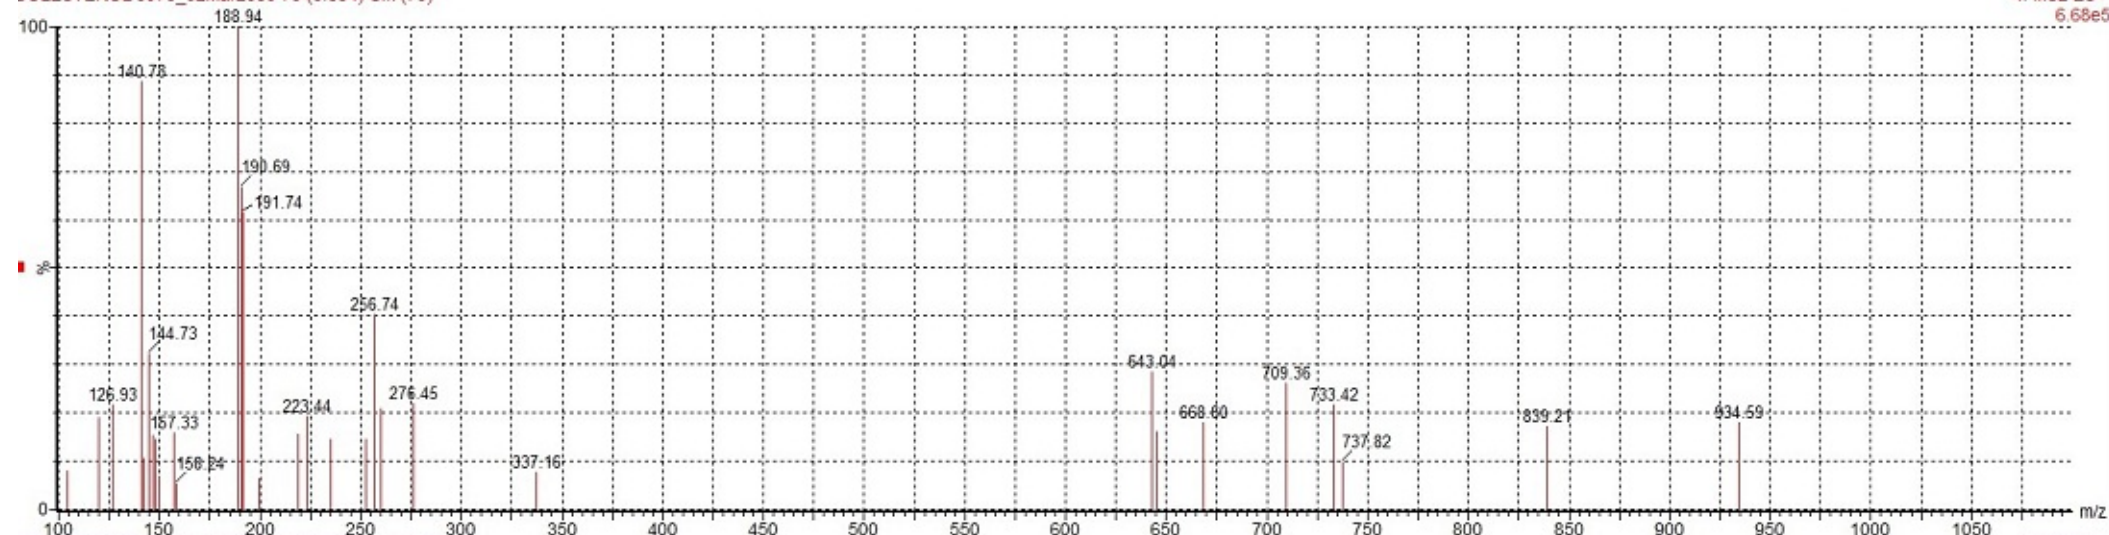

DOLESTEROL 3073\_02Mar2350 69 (3.480) Cm (68.79)

4: MS2 ES+  
5.36e5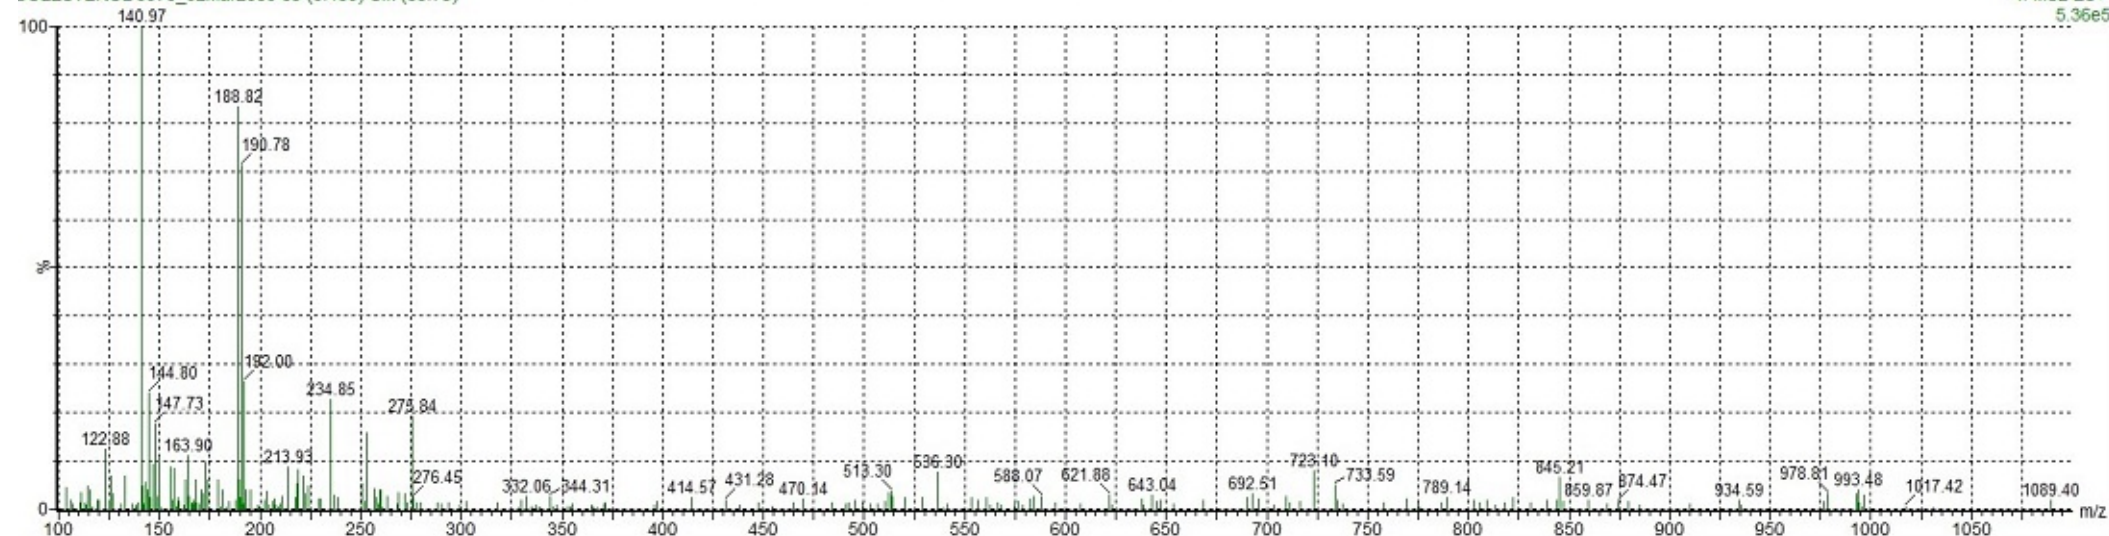 $m/z = 934.59 [M+H]^+$ 

Figure S4. Mass spectrum (MS) cyclic hexapeptide

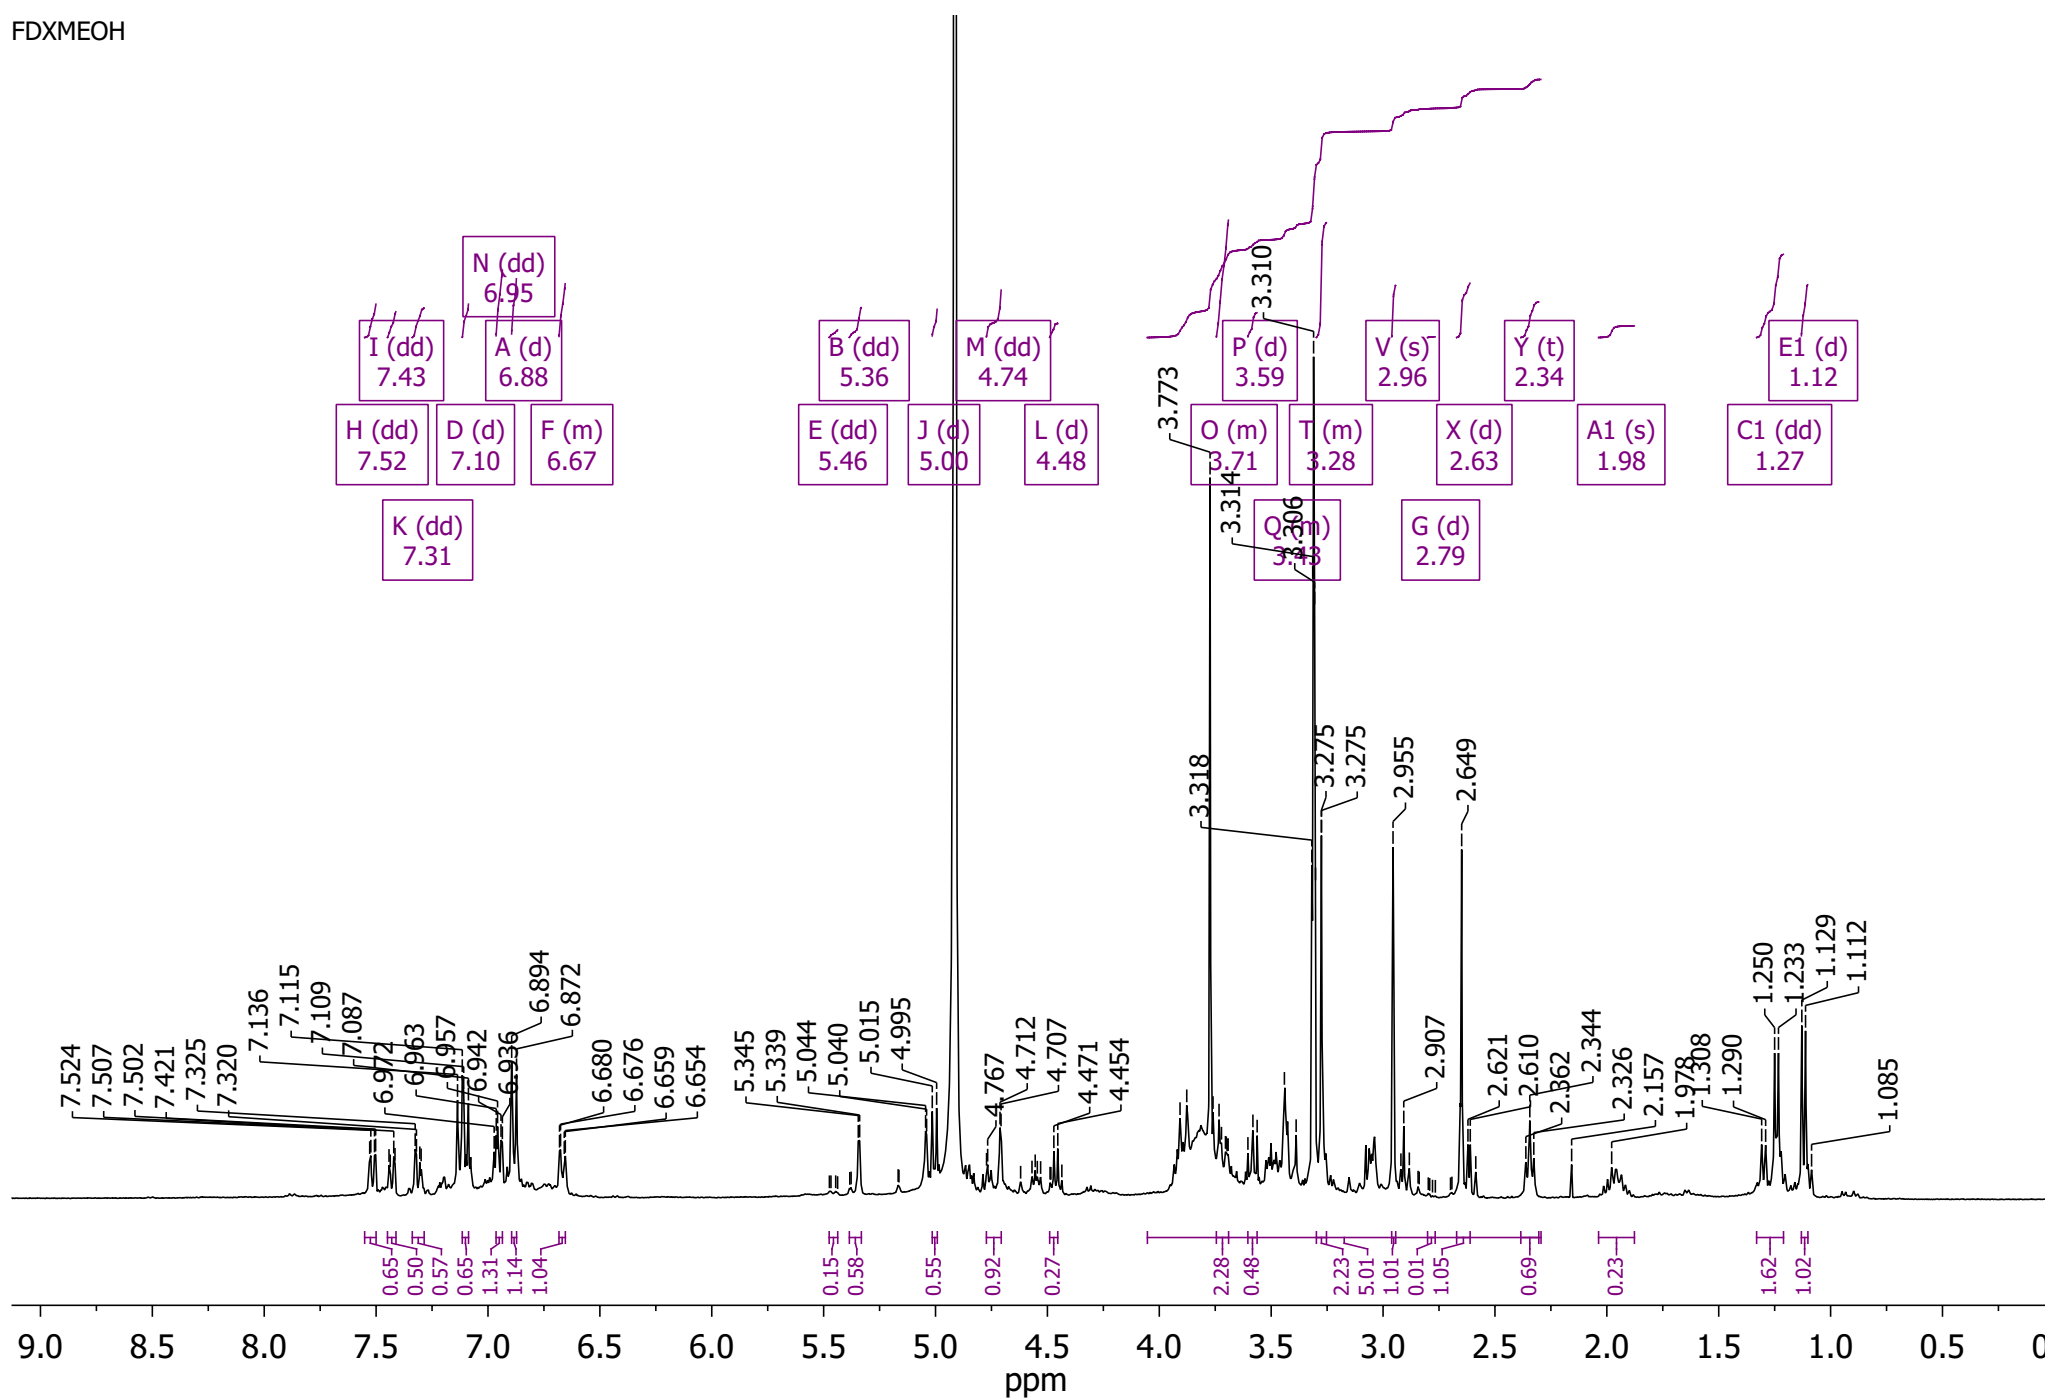Figure S5.  $^1\text{H}$  NMR ( $\text{CD}_3\text{OD}$ , 500 MHz) Rubiayunnanesis H

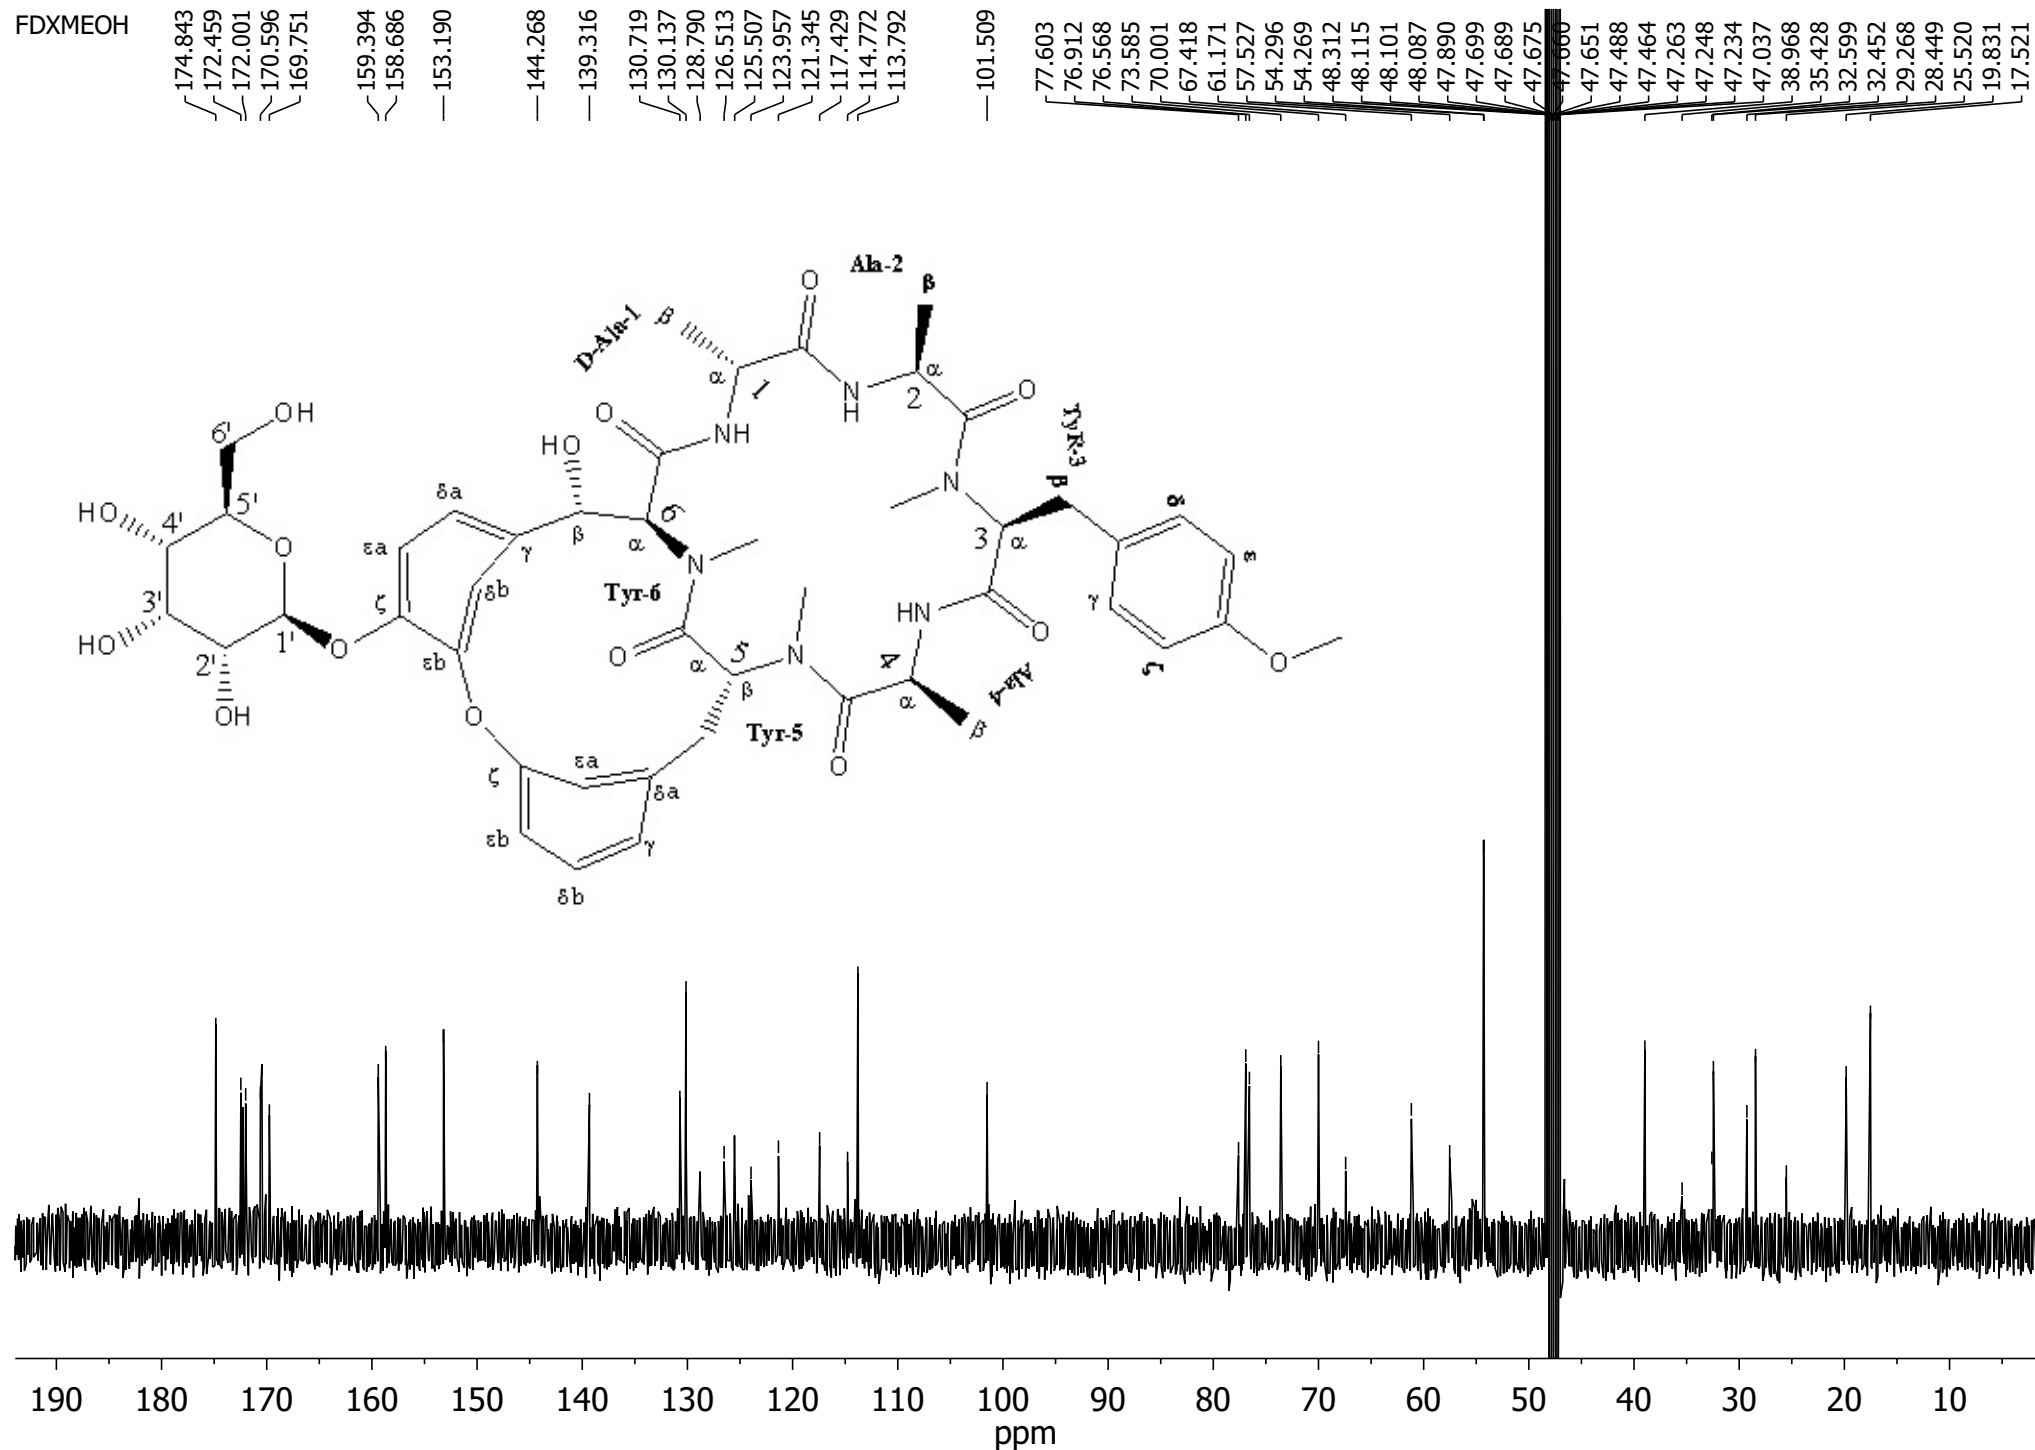

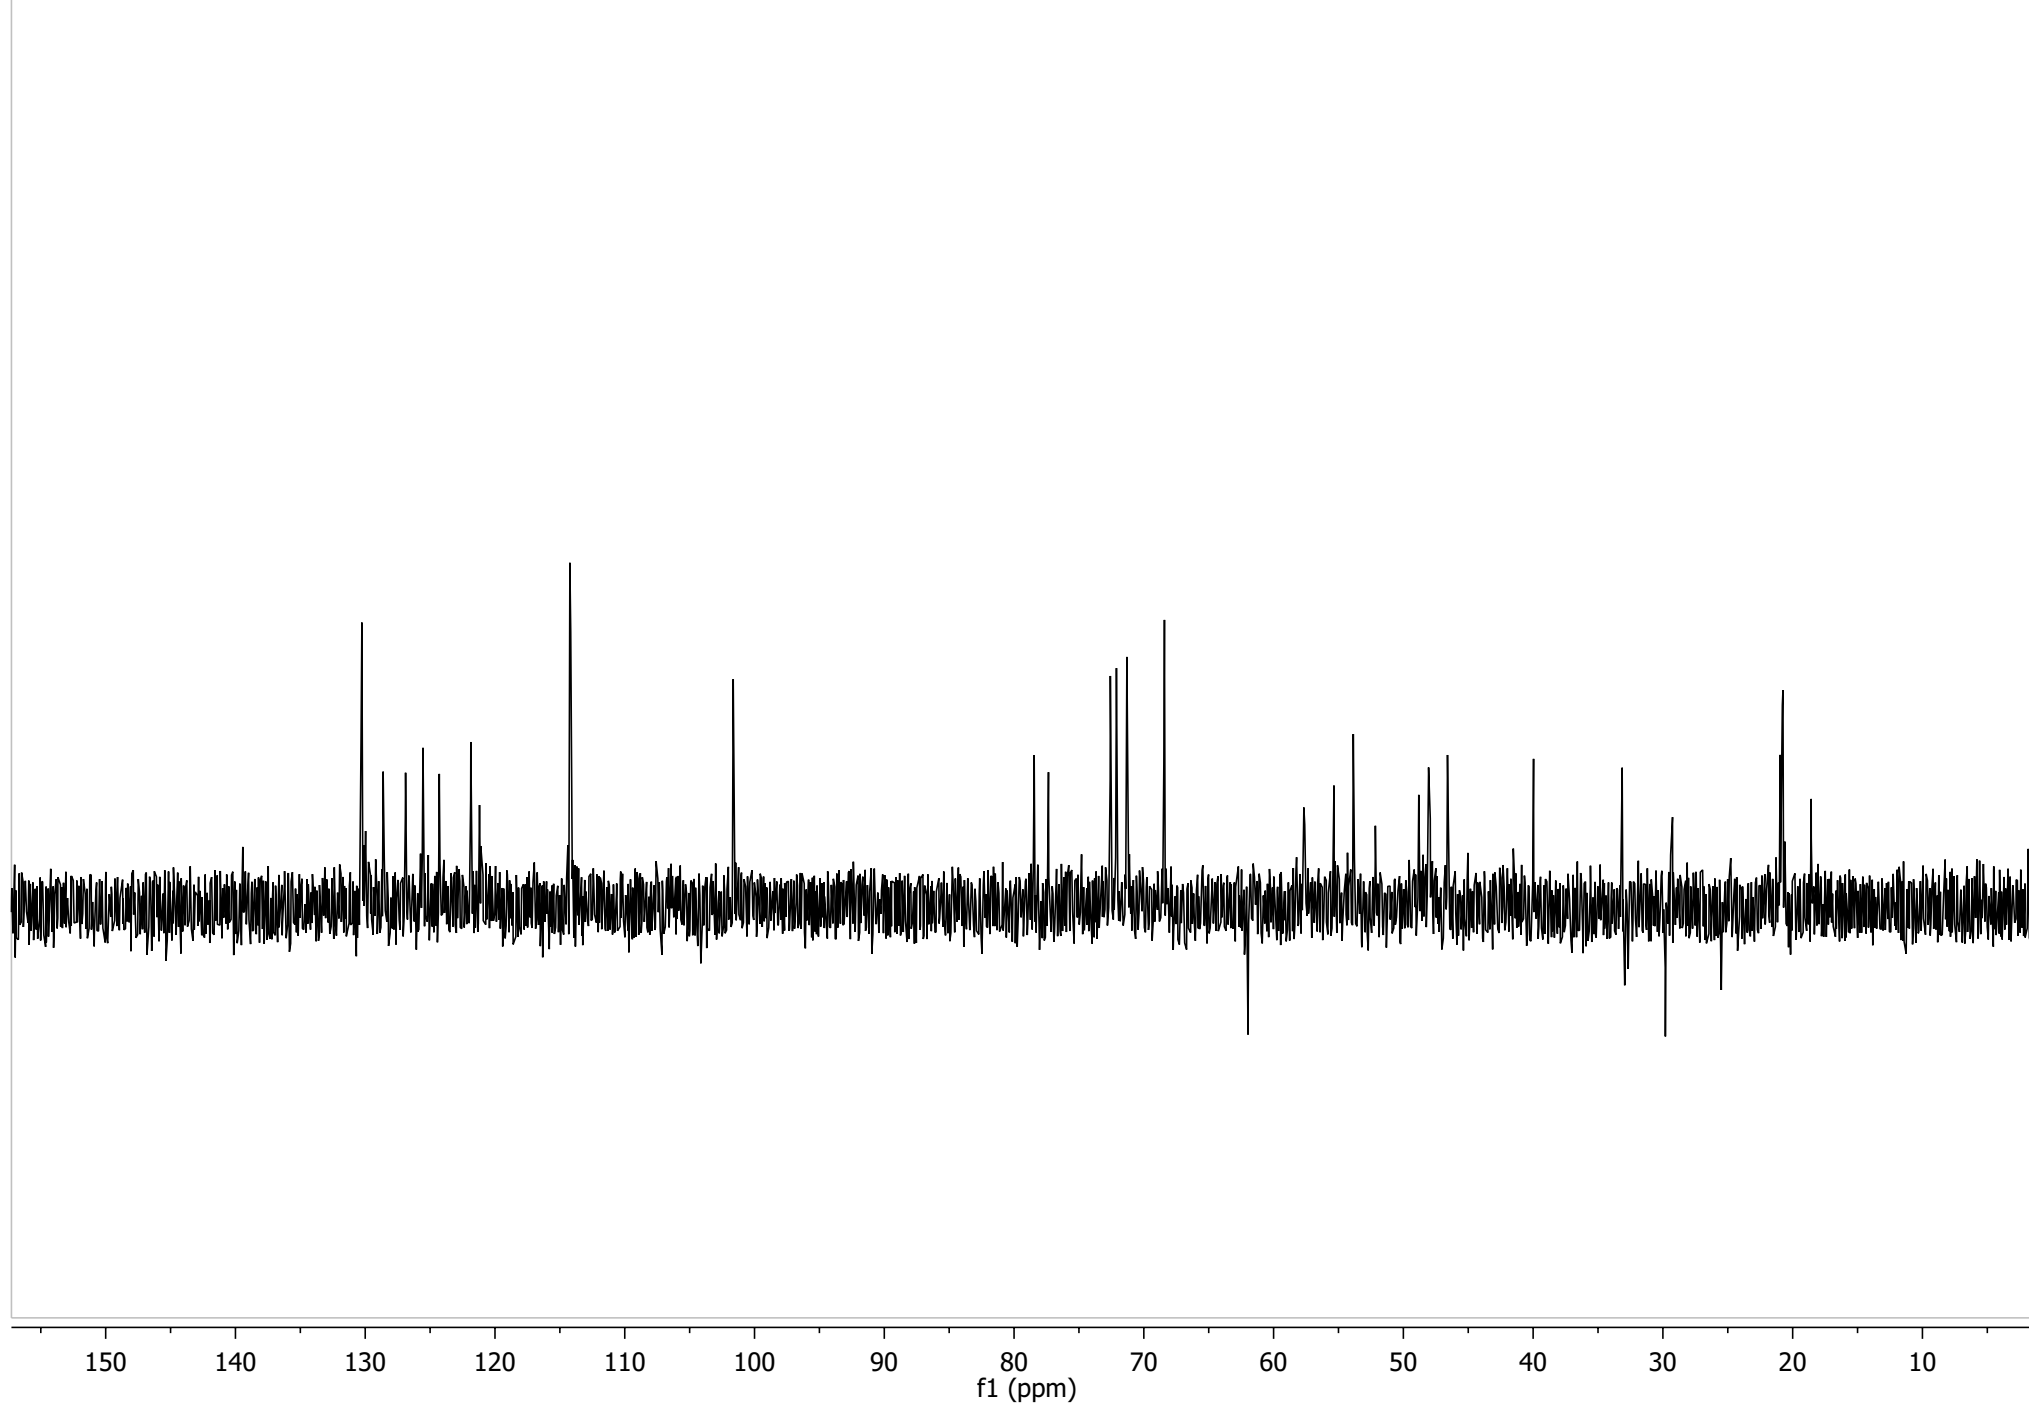

Figure S7.  $^{13}\text{C}$  NMR (DEPT) Rubiayunnanesis H

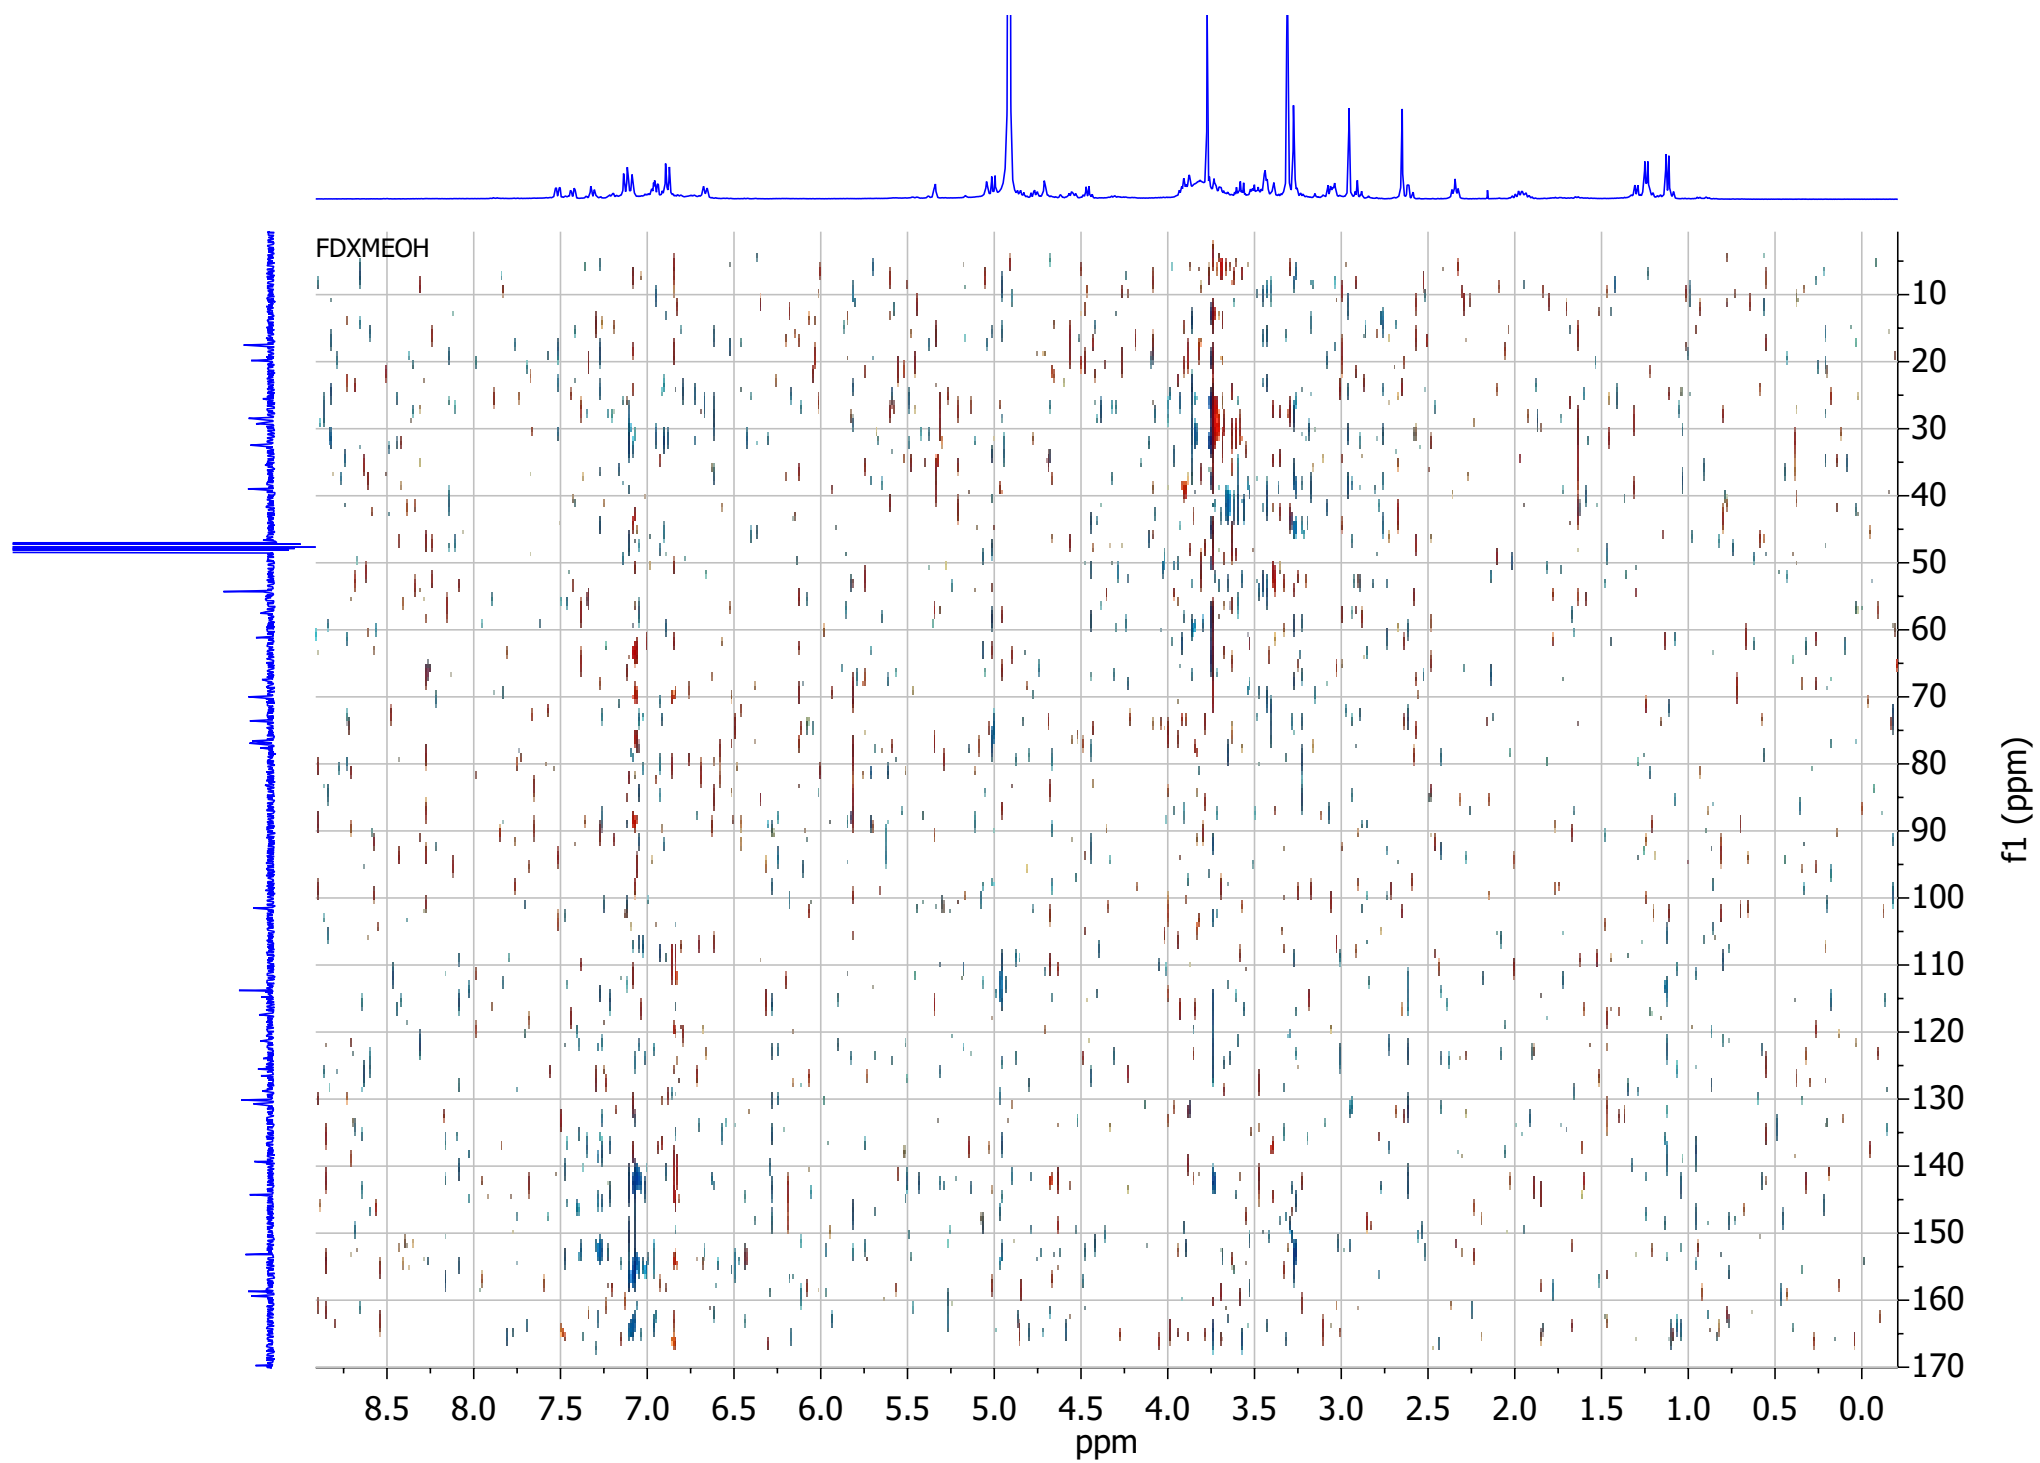

Figure S8. Spectrum HSQC Rubiayunnanesis H

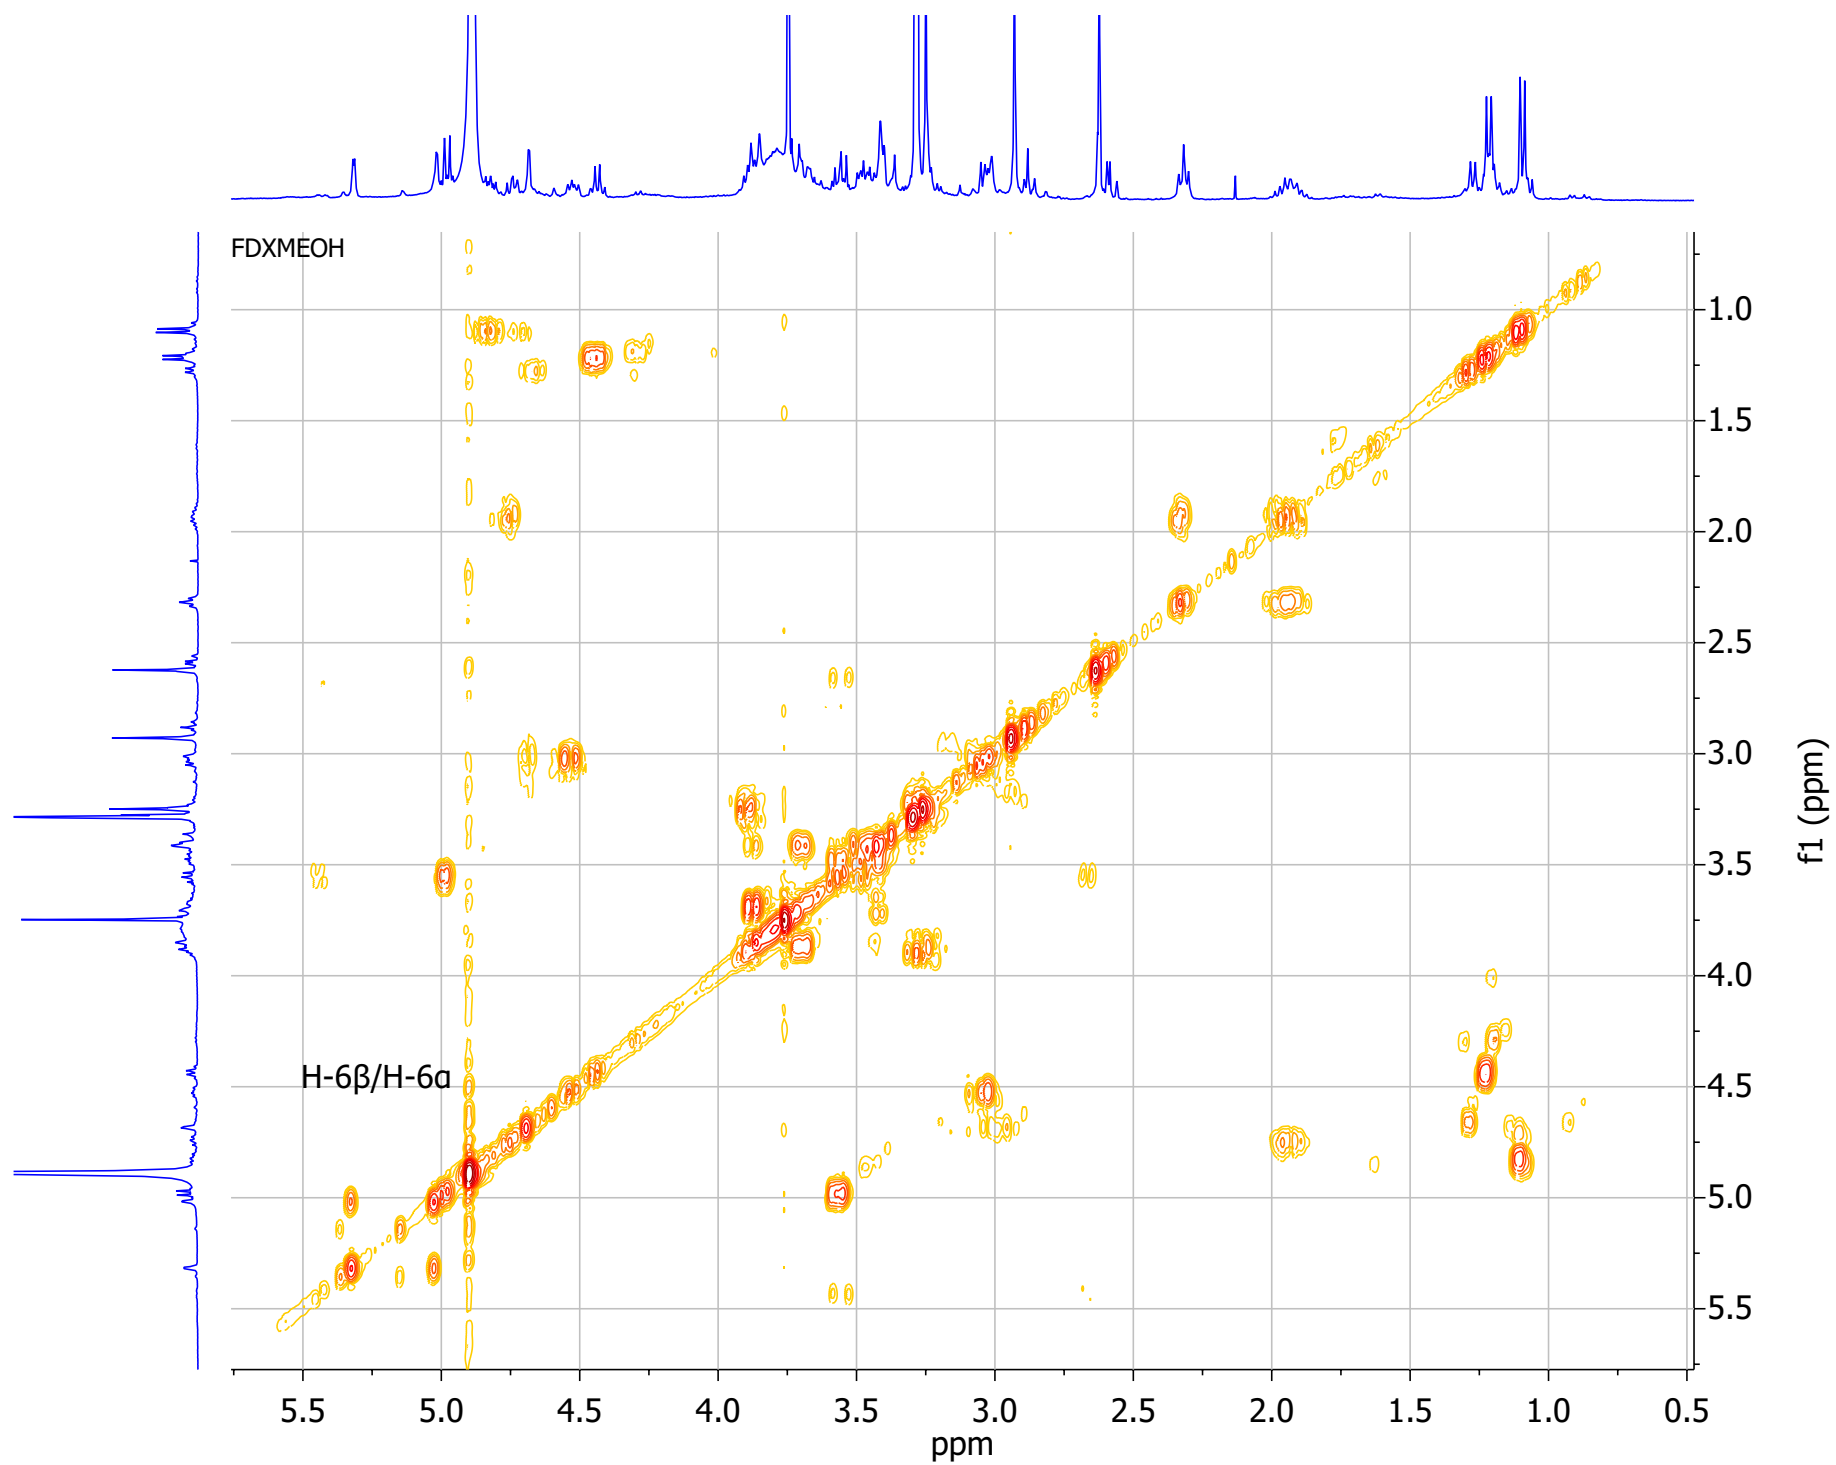

Figure S9.  $^1\text{H}$ - $^1\text{H}$  COSY Rubiayunnanesis H
